1  
2  
3  
4  
5  
6  
7  
8  
9  
10  
11  
12  
13  
14  
15  
16  
17  
18  
19  
20  
21  
22  
23  
24  
25

**Extracellular matrix scaffold-assisted tumor vaccines induce tumor regression  
and long-term immune memory.**

Sanjay Pal (1), Rohan Chaudhari (1,2), Iris Baurceanu (1), Brenna J. Hill (3), Bethany A. Nagy  
(4), Matthew T. Wolf\* (1)

- (1) Cancer Biomaterial Engineering Section, Cancer Innovation Laboratory, CCR, National Cancer Institute, Frederick, MD 21702.
- (2) OHSU School of Medicine, Oregon Health & Science University, Portland, OR 97239.
- (3) AIDS and Cancer Virus Program, Frederick National Laboratory for Cancer Research, Frederick, MD 21702
- (4) Laboratory Animal Sciences Program (LASP), National Cancer Institute, Frederick, MD 21702.

\*Correspondence to: [matthew.wolf@nih.gov](mailto:matthew.wolf@nih.gov)

26 **Abstract:**

27 Injectable scaffold delivery is an immune engineering strategy to enhance the efficacy and  
28 reliability of cancer vaccine immunotherapy. The composition and structure of the biomaterial  
29 scaffold determines both vaccine release kinetics and inherent immune stimulation via the  
30 scaffold host response. Extracellular matrix (ECM) scaffolds prepared from decellularized tissues  
31 initiate an acute alternative inflammatory response following implantation, which facilitates wound  
32 healing following tumor resection and promotes local cancer immune surveillance. However, it  
33 remains unknown whether this environment is compatible with generating protective anti-tumor  
34 cytotoxic immunity with local immunotherapy delivery. Here, we engineered an ECM scaffold-  
35 assisted therapeutic cancer vaccine that maintained an immune microenvironment consistent  
36 with tissue reconstruction. Immune adjuvants MPLA, GM-CSF, and CDA were screened in a  
37 cancer vaccine formulated for decellularized small intestinal submucosa (SIS) ECM scaffold co-  
38 delivery. Though MPLA and GM-CSF showed the greatest increase in local myeloid cell  
39 infiltration, we found that the STING pathway adjuvant CDA was the most potent inducer of  
40 cytotoxic immunity with SIS-ECM scaffold delivery. Further, CDA did not diminish hallmark ECM  
41 immune responses needed in wound healing such as high *IL4* cytokine expression. SIS scaffold  
42 delivery enhanced therapeutic vaccine efficacy using CDA and the antigen ovalbumin, curing  
43 greater than 50% of established EG.7 tumors in young mice and 75% in 24-week-old mature  
44 mice, compared to soluble components alone (0% cured). SIS-ECM scaffold assisted vaccination  
45 extended antigen exposure, was dependent on CD8<sup>+</sup> cytotoxic T cells, and generated long term  
46 anti-tumor memory at least 7 months post-vaccination in both young and mature-aged mice. This  
47 study shows that an ECM scaffold is a promising delivery vehicle to enhance cancer vaccine  
48 efficacy while being orthogonal to characteristics of pro-healing immune hallmarks.

49 **Introduction:**

50 Cancer immunotherapy has been a revolutionary step in cancer treatment. Several classes of  
51 immunotherapy have generated curative responses when treating solid tumors including immune  
52 checkpoint inhibitors, adoptive T cell therapy, and therapeutic cancer vaccines [1]. However,  
53 these successes are not uniform, and tumor regression occurs in only a minority of patients  
54 necessitating immune engineering strategies to enhance efficacy and reliability [2]. Biomaterial  
55 scaffold-assisted cancer vaccines are one such strategy. Injectable scaffolds from diverse  
56 compositions have been engineered to enhance anti-tumor immune responses via material  
57 properties that prolong vaccine component delivery and by synergizing with biomaterial induced  
58 leukocyte recruitment and activation that occurs during the host immune response [3]. The goal  
59 is that the scaffold immune response acts synergistically with an appropriate immune adjuvant to  
60 accentuate the density and activity of antigen presenting cells (such as dendritic cells and  
61 macrophages) to prime adaptive immune cells. The net result is a coordinated cytotoxic T cell  
62 response that is tumor antigen specific and can establish protective immunological memory. This  
63 is in contrast to systemic drug delivery modalities such as nanoparticles where biomaterials are  
64 often formulated as a passive vehicle with minimal immune activation.

65

66 Extracellular matrix (ECM) scaffolds are medical devices derived from decellularized mammalian  
67 tissues that are increasingly used biomaterials in cancer care, where they are implanted in  
68 patients during reconstructive surgeries immediately following tumor resection [4-8]. ECM  
69 scaffolds are immunomodulatory but generate an immune environment that is entirely distinct  
70 from the foreign body reaction generated by many synthetic, polymeric scaffold materials. ECM  
71 scaffolds initiate a complex local immune profile that includes a mixed M1/M2 milieu of  
72 macrophage phenotypes [9, 10], a Th2 biased CD4+ T helper cell response [11, 12], and Type 2  
73 immune signatures such as eosinophils and elevated IL-4 cytokine [10-12]. ECM scaffold immune  
74 modulation has been shown to be indispensable to tissue repair and constructive scaffold

75 remodeling [11, 13-15], and recently, this local ECM scaffold immune environment had been  
76 shown to delay tumor formation when seeded with aggressive melanoma cells synergistically with  
77 systemic administration of immune checkpoint blockade immunotherapy [10]. Though the local  
78 immune environment is inhospitable to tumor progression, cytotoxic effector cells that are needed  
79 for treating distant tumors and metastases, such as CD8+ cytotoxic T cells and Natural Killer (NK)  
80 cells, were only nominally enriched in this ECM immune environment. While several studies have  
81 investigated biomaterial assisted cancer vaccines composed of polymer scaffolds[16-21], few  
82 have examined the potential of ECM scaffolds in cancer vaccine delivery [22-24].

83  
84 Therefore, a critical question is whether the ECM scaffold immune environment can synergize  
85 with local cancer immunotherapy strategies to engage tumor specific cytotoxic adaptive immune  
86 cells (e.g., cytotoxic T cells) while also preserving the beneficial pro-regenerative hallmarks of the  
87 ECM scaffold response. The objectives of the present study were to leverage the material and  
88 immune modulating properties of ECM scaffolds to develop an effective therapeutic cancer  
89 vaccine, and for this formulation be orthogonal to ECM immune biomarkers that had been  
90 previously associated with successful tissue reconstruction. To achieve this goal, we first  
91 characterized the local, regional, and systemic immunological changes when ECM scaffolds are  
92 used to deliver immune stimulating adjuvants. We then utilized an *in vivo* cytotoxic lymphocyte  
93 assay to elucidate an adjuvant formulation that induced antigen-specific cellular immunity when  
94 delivered with an ECM scaffold and characterized antigen release properties. Finally, we  
95 implemented this formulation to determine feasibility of a biologic scaffold vaccine to  
96 therapeutically treat established tumors and to decipher the immune mechanisms of this  
97 response.

98

99

100 **Results:**

101 *The ECM scaffold immune microenvironment is temporally modified by immune adjuvant co-*  
102 *delivery and depends on adjuvant type.*

103

104 Decellularized porcine small intestinal submucosa (SIS) ECM was prepared for use as an  
105 archetypical ECM scaffold biomaterial and cryogenically milled into an injectable particulate (**Fig**  
106 **1A**). SIS was selected because it has been extensively studied in soft tissue repair in both pre-  
107 clinical and clinical models, including in cancer treatment [7, 8, 25, 26]. An injectable formulation  
108 permits minimally invasive localized delivery and avoids the trauma of surgical implantation thus  
109 isolating the host response to the ECM scaffold itself (**Fig 1B**). Decellularization was confirmed  
110 by lack of visible nuclei with H&E and DAPI staining of histologic sections (**Fig 1C, D**) and a 95%  
111 reduction in double stranded DNA content (360.7 ng/mg in SIS vs 6,861.1 ng/mg in native  
112 intestine, dry weight, **Fig 1E**). The resulting SIS particles ranged between 41-70  $\mu\text{m}$  in size as  
113 quantified from scanning electron microscopy (SEM) images (95% confidence interval), while still  
114 preserving characteristic ECM structures such as the banding pattern found in intact triple helical  
115 collagen fibrils (**Fig 1F, G**). SIS particles were sterilized via ionizing irradiation and pathogen  
116 screened prior to *in vivo* studies.

117

118 Tumor antigen uptake is the first step of generating cytotoxic cellular immunity during cancer  
119 vaccination, and since previous studies showed that leukocytes readily infiltrated ECM scaffold  
120 biomaterials [10, 11, 13, 27], we sought to determine if these cells were capable of internalizing  
121 exogenous vaccine antigen. We adsorbed the model antigen ovalbumin (OVA) to SIS ECM for  
122 subcutaneous injection in mice and found uptake in nearly 5% of infiltrating CD45<sup>+</sup> immune cells  
123 within 3 days (**Fig 1H**). We then investigated whether immune adjuvant co-delivery could activate  
124 antigen specific cytotoxic immunity against this delivered antigen within the SIS ECM immune  
125 microenvironment without diminishing other immune hallmarks associated with healing. We

126 selected adjuvants that stimulate minimally overlapping immune activation pathways and have  
127 shown promise in clinical vaccine trials. MPLA (Monophosphoryl Lipid A) is a TLR-4 agonist  
128 transduced through the MyD88 and TRIF signaling pathways [28, 29]; CDA (the cyclic di-AMP  
129 analog 2'3'-c-di-AM(PS)<sub>2</sub> (Rp,Rp)) which activates the STING pathway to produce type I  
130 interferons [30-32]; GM-CSF (Granulocyte-macrophage colony-stimulating factor) which  
131 mobilizes myeloid cells and promotes differentiation to antigen presenting cells (**Fig 1I**) [33, 34].  
132 To preserve native ECM scaffold properties, we did not modify ECM composition and used  
133 passive adsorption and absorption of each adjuvant with lyophilized SIS ECM particles prior to  
134 subcutaneous injection in C57Bl/6 mouse flanks.

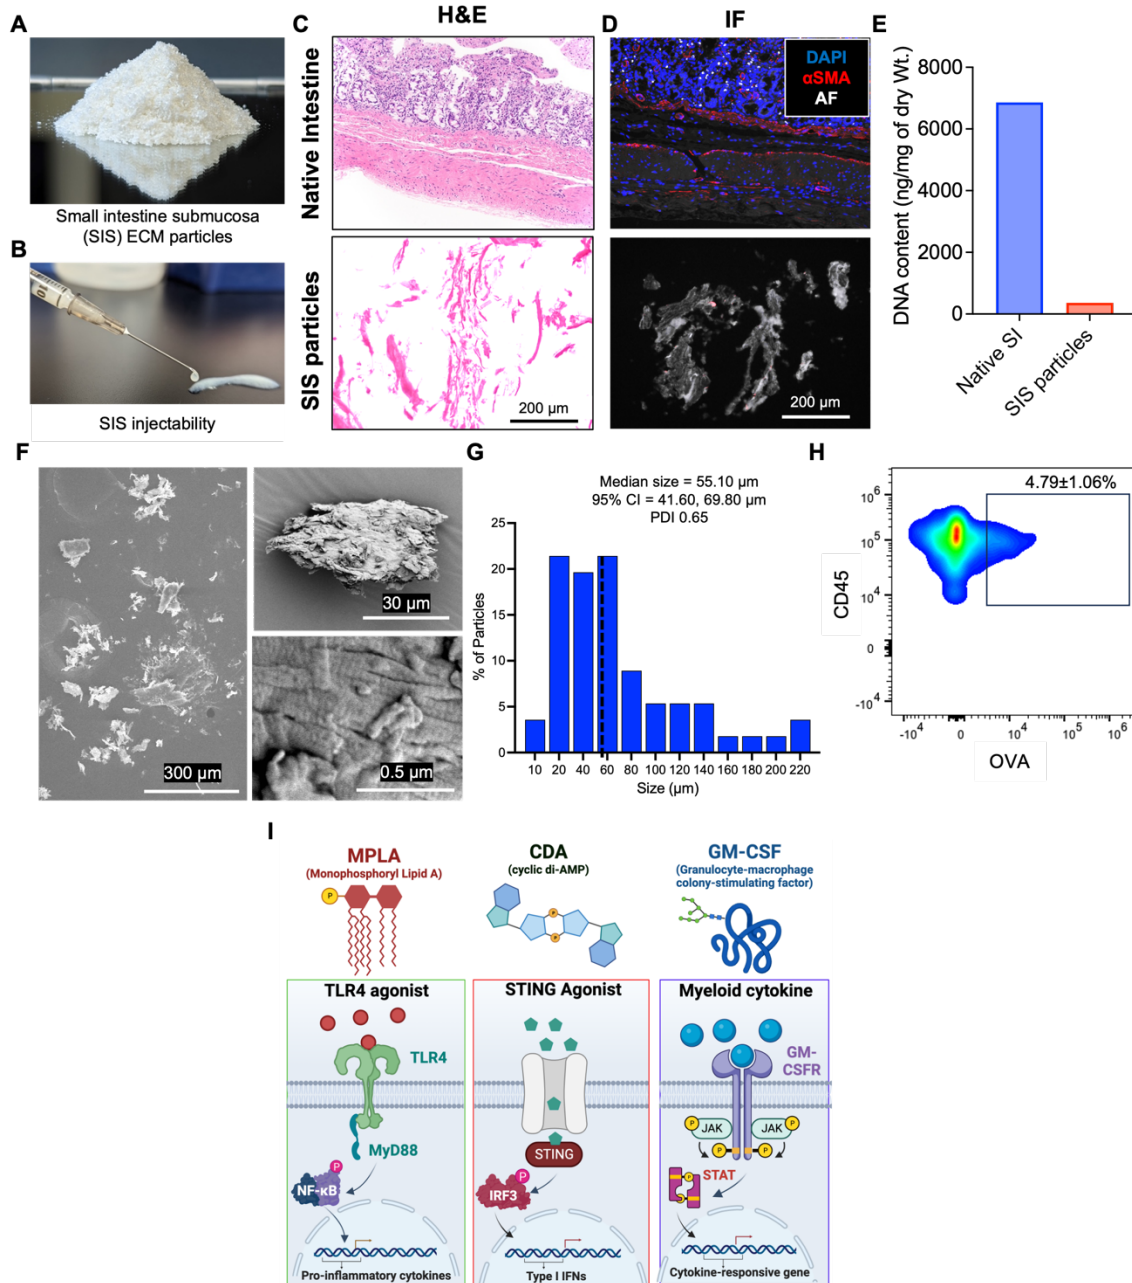

135

136 **Figure 1: Injectable SIS ECM particle characterization and immune adjuvant selection.** (A) SIS  
 137 particles prepared from cryogenically milled decellularized porcine submucosa, which (B) was hydrated  
 138 for injectable delivery. SIS decellularization compared to native intestine was confirmed via (C) H&E  
 139 histology of SIS particles, (D) removal of nuclei (DAPI) and smooth muscle actin (αSMA) staining, and  
 140 (E) reduction of total double stranded DNA content via the PicoGreen assay. (F) SEM imaging of SIS  
 141 particle topography and (G) particle size distribution. (H) Quantification of ovalbumin antigen (OVA)  
 142 uptake in immune cells infiltrating SIS scaffolds 3 days after subcutaneous implantation in mice. (I)  
 143 Mechanism of action of SIS particles combined with one of three immune adjuvants for subsequent

144 studies: MPLA, CDA, and GM-CSF (Created with BioRender.com). AF, autofluorescence; SI, small  
145 intestine; CI, confidence interval; PDI, polydispersity index.

146

147 We first characterized how each adjuvant modulated the local SIS ECM scaffold immune  
148 microenvironment and found profound changes to both leukocyte recruitment and spatial  
149 distribution. During the acute phase of the immune response, SIS ECM particles aggregated at  
150 the injection site with acute host cell infiltration concentrated around the implant border with  
151 sporadic clusters of cell accumulation within inter particle spaces (**Fig 2A arrows**). In the absence  
152 of adjuvant, total cellularity modestly peaked at 7 days (3,221 cell/mm<sup>2</sup>), but remained relatively  
153 constant over the 1-14 day time course (**Fig 2A,B**). The TLR4 agonist MPLA caused the most  
154 striking increase on SIS cellularity of all adjuvants tested, recruiting nearly 4,896 cells/mm<sup>2</sup> after  
155 1 day that remained chronically elevated at this level after 14 days creating an infection-mimicking  
156 appearance with abundant polymorphonuclear cells (**Fig 2A, B**). The cytokine GM-CSF also  
157 rapidly induced high acute inflammatory response as MPLA after 1 day similar to MPLA but had  
158 returned to SIS control levels by day 14. Unexpectedly, the STING agonist CDA decreased initial  
159 cell recruitment by approximately 20% after 1 day before returning to control SIS levels. Though  
160 fewer cells were observed, there was no evidence of local tissue necrosis in adjacent muscle,  
161 adipose, or hypodermis with CDA delivery, nor with other adjuvants. STING activation-induced  
162 apoptosis has been observed in specific cell populations such as B cells after chronic exposure,  
163 but not in fibroblasts [35], however the decreased cellularity in this study appears to be short lived.  
164 Spatially, cellularity was greatest at the SIS interface (within 200  $\mu$ m of the implant border) with  
165 relatively few cells infiltrating the core. Evidence of ECM degradation via fragmentation was most  
166 prominent with MPLA co-delivery where it increased the aggressiveness of this remodeling  
167 response (**Fig 2A**).



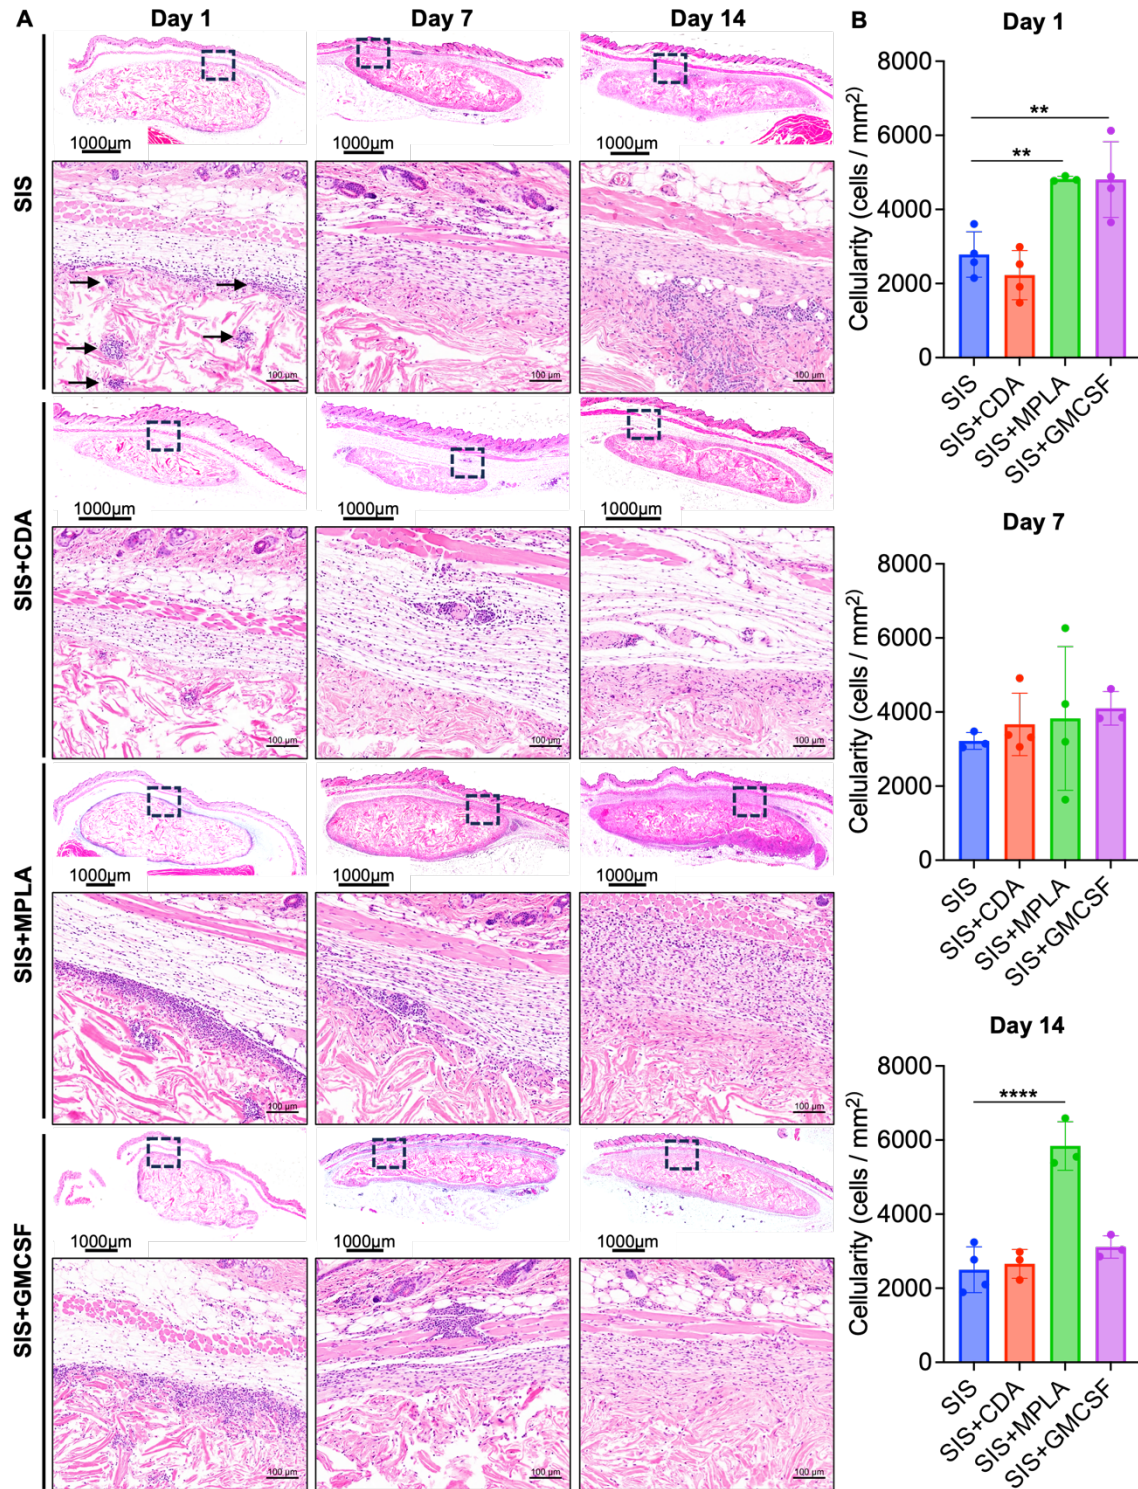

168

169 **Figure 2. Histologic host response to SIS ECM implantation with immune adjuvant co-delivery.** (A)  
 170 H&E stained images showing the morphology of subcutaneously injected SIS ECM particles in C57Bl/6  
 171 mice alone or with the immune adjuvants CDA, MPLA or GM-CSF at 1, 7 and 14 days post implantation.  
 172 Boxes highlight immune infiltrates at the scaffold interface (20X). (B) Total cell density was quantified at the

173 SIS ECM interface across the entire section (N=3-4, mean  $\pm$  SD). \*\* $p < 0.01$ , \*\*\*\* $p < 0.0001$ , one-way  
174 ANOVA with Dunnett's multiple comparisons test.

175

176 Myeloid lineage cells of the innate immune system are the first responders to implanted  
177 biomaterials, play a deterministic role in downstream scaffold remodeling [13], and are crucial to  
178 the vaccine response [16, 18]. We therefore sought to determine the immune phenotype and  
179 distribution of SIS ECM infiltrating cells by multiplex immunofluorescence staining. Neutrophils  
180 (Ly6G<sup>+</sup>), macrophages (F4/80<sup>+</sup>), and antigen presenting cells (APCs, CD86<sup>+</sup>) were selected to  
181 characterize the myeloid cell types that define the host immune response to biomaterials and  
182 antigen presentation for vaccines (**SFig 1B**). Neutrophils and APCs accounted for the majority of  
183 myeloid cells in the acute SIS ECM control response 1 day post-implantation and then completely  
184 subsided, giving way to macrophages by day 7 at the SIS interphase (**Fig 3A,B and SFig 1A**).  
185 Adjuvant co-delivery increased neutrophil infiltration 2-fold in MPLA and GM-CSF groups,  
186 compared to SIS controls at the interphase (**Fig 3A,B**). CDA delivery did not alter neutrophil  
187 density, though slight decreases in other populations increased overall proportion (**Fig 3C**).  
188 Myeloid infiltration was substantially lower in the implant core for each group and consisted  
189 primarily of neutrophils after 1 day that was significantly increased by GM-CSF delivery (**Fig 3D**).  
190 For each group, macrophage infiltration within the core gradually increased to 14 days, and APCs  
191 remained rare (**Fig 3D and SFig 1C**).

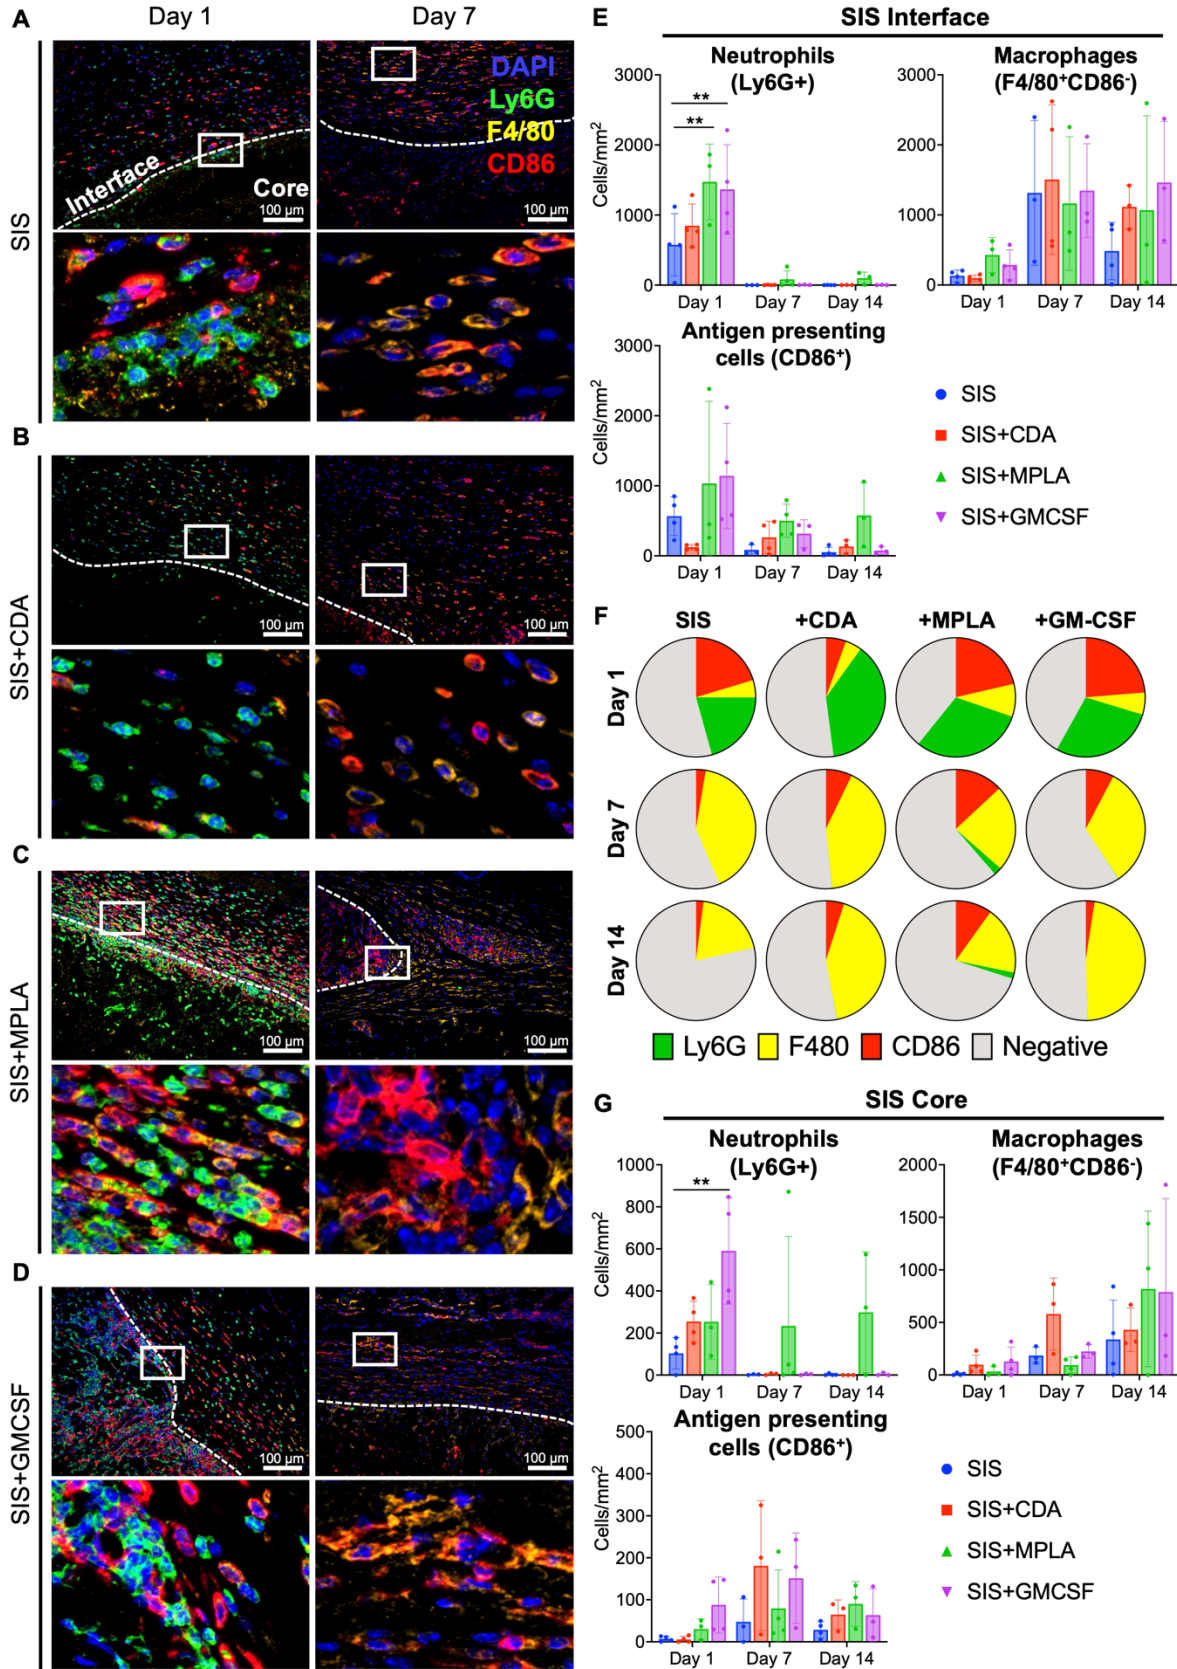

193 **Figure 3. Spatiotemporal immune profiling SIS ECM scaffolds co-delivered with immune adjuvant.**

194 (A-D) Multiplex immunofluorescent images of subcutaneously injected SIS ECM particles in C57Bl/6 mice  
195 alone or with the immune adjuvants CDA, MPLA or GM-CSF at 1 and 7 days post implantation (20X  
196 objective). Day 14 images are available in SFig 1C. Dashed lines delineate the SIS ECM implant border  
197 and boxes detail immune phenotype at this interface. The interface was defined as 200 um concentrically  
198 from the border, and the core as greater than 200 um towards the center SFig A. (E) Myeloid cell density  
199 (N=3-4, mean  $\pm$  SD) and (F) proportions of each cell type quantified across the entire SIS interface. (G)  
200 Myeloid cell density quantification within the SIS ECM implant core with adjuvant (N=3-4, mean  $\pm$  SD). \*\**p*  
201 < 0.01, two-way ANOVA with Tukey's multiple comparisons test.

202

203 The local immune response to a biomaterial scaffold is primarily composed of myeloid cell  
204 infiltration, however, antigen specific lymphocyte priming most efficiently occurs in lymphoid  
205 tissues such as regional draining lymph nodes. Previous studies have shown that IL-4 expression  
206 is a hallmark of the pro-regenerative ECM scaffold immune environment [10-12], thus we used  
207 *Il4* gene expression in SIS implant draining lymph nodes as an indicator of regional immune  
208 modulation by ECM and to determine whether this response is perturbed by adjuvant. Conversely,  
209 *Ifny* (encoding cytokine interferon-gamma) expression is a biomarker of Th1 immunity that can be  
210 induced by certain cytotoxic inducing adjuvants and during infection. Since adaptive priming takes  
211 several days to develop, we evaluated lymph nodes 7- and 14-days post implantation, compared  
212 to a naïve control (without ECM or adjuvant injection). SIS ECM alone induced 7.5-fold increased  
213 lymph node *Il4* expression compared to naïve lymph nodes, and unexpectedly retained elevated  
214 expression in all adjuvant groups, and both MPLA and GM-CSF significantly increased expression  
215 relative to SIS only controls at 7 days. Most adjuvant groups returned to SIS control *Il4* expression  
216 baseline by 14 days except GMCSF which showed a 9-fold decrease (**Fig 4A**). The Th1  
217 associated gene *Ifny* showed a slight decrease with ECM implantation compared to naïve mice,  
218 with no significant modulation with adjuvant (**Fig 4B**). These results show that adjuvant delivery  
219 is largely orthogonal to Th2 activation features of the ECM host response.

220

221 An advantage of biomaterial vaccine delivery strategies is the ability to achieve high local  
222 concentrations that would otherwise be toxic if given systemically. We analyzed peripheral blood  
223 plasma using a Luminex cytokine panel 1, 7, and 14 days after adjuvant co-delivery with SIS-  
224 ECM to evaluate risk of deleterious systemic dysregulation, such as cytokine storm. SIS ECM  
225 implantation alone did not affect circulating cytokine levels in any of the 21 analytes tested (**Fig**  
226 **4C, Supplementary Tables 2**). CDA and MPLA adjuvant co-delivery induced only transient  
227 elevation of specific cytokines and chemokines 1 day after implantation resolving to baseline by  
228 7 days (**Fig 4C-E and SFig 2A**). CCL5 and MIP-1 beta were increased by CDA delivery, and IP-  
229 10 increased with either CDA or MPLA adjuvant delivery (**Fig 4C-E**). These results show that  
230 adjuvant delivery with ECM is tightly regulated with only acute perturbations to homeostasis that  
231 are not long lasting.

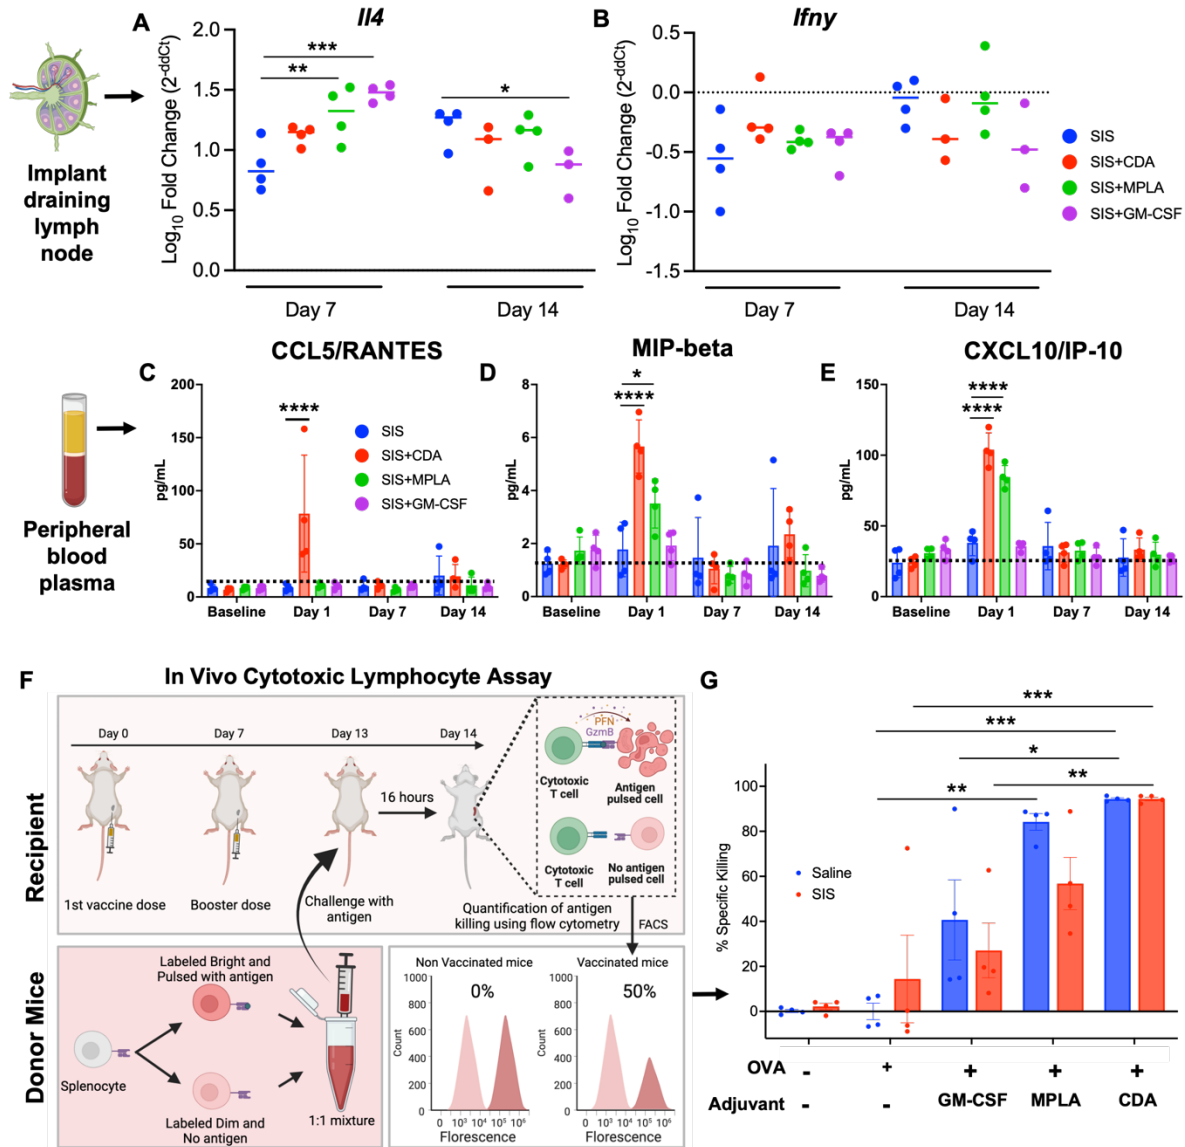

232

233 **Figure 4. Lymph node and systemic immune modulation with ECM and adjuvant delivery.**  
 234 Quantitative real time PCR of (A) *Ii4* and (B) *Ifny* gene expression in scaffold draining lymph nodes 7 and  
 235 14 days after SIS ECM co-delivery with adjuvants. (N=3-4, mean ± SD). \*\**p* < 0.01, \*\*\**p* < 0.001, two-way  
 236 ANOVA with Šidák's multiple comparisons test (C-E) Peripheral blood was collected 2 days before SIS  
 237 ECM implantation (Baseline) then 1, 7, and 14 days post implantation for Luminex analysis. (N=3-4, mean  
 238 ± SD). \**p* < 0.05, \*\*\*\**p* < 0.0001, two-way ANOVA with Tukey's multiple comparisons test. (F) Schematic  
 239 of the in vivo cytotoxic lymphocyte assay procedure (Created with BioRender.com). (G) Quantification of  
 240 OVA antigen-specific cytotoxic T cell killing when SIS ECM was co-delivered with each adjuvant type. (N=3-  
 241 4, mean ± SD). \**p* < 0.05, \*\**p* < 0.01, \*\*\**p* < 0.001, two-way ANOVA with Tukey's multiple comparisons test.

242

243 *The STING agonist CDA optimally induces antigen-specific cytotoxic T cell activity in the ECM*  
 244 *immune environment.*

245

246 The primary objective of a cancer vaccine is to prime and activate antigen specific anti-tumor  
247 lymphocytes to systemically target neoplasms. We performed an *in vivo* cytotoxic T lymphocyte  
248 (CTL) assay to quantify T cell activity to determine whether the ECM host immune  
249 microenvironment was compatible with vaccination using the tested adjuvants using the antigen  
250 ovalbumin (OVA). Mice were administered a subcutaneous flank priming and booster vaccination  
251 dose consisting of SIS, adjuvant, and OVA at day 0 and day 7, respectively, and challenged with  
252 adoptively transferred splenocytes pulsed with either the MHCI (H-2Kb) restricted OVA peptide  
253 SIINFEKL or negative control (**Fig 4F**). Vaccine efficacy was calculated by antigen-specific killing  
254 efficiency of transferred cells harvested from systemic lymphoid tissue, spleen. As expected, SIS  
255 ECM alone did not reliably induce OVA specific immunity and required cytotoxic-inducing  
256 adjuvant. GM-CSF was the least effective adjuvant for both ECM and Saline controls. MPLA  
257 generated 82% cell killing when delivered as a soluble vaccine, but was less effective and  
258 consistent with SIS delivery at 50% killing. In contrast, CDA was the most effective cytotoxic  
259 adjuvant with ECM delivery, generating greater than 95% specific killing with both Saline and  
260 ECM (**Fig 4G**). We then performed CDA titrations between 0.2-20  $\mu\text{g}$  using a simplified version  
261 of the CTL assay and found similar cytotoxic activity when delivered with SIS ECM or Saline at  
262 all concentrations, including a small decrease in potency at the lowest dose of 0.2  $\mu\text{g}$  (**SFig 2B**).  
263 This suggests the mechanism of action for the STING agonist CDA is compatible with vaccination  
264 when delivered with an ECM scaffold biomaterial.

265

266 *ECM scaffolds prolong antigen retention and release kinetics.*

267 A key feature of biomaterial scaffold vaccine delivery is the ability to modify retention and  
268 exposure of vaccine components, and the optimal delivery kinetics likely varies empirically by  
269 specific formulation and mechanism. We characterized retention and release kinetics of vaccine  
270 components from SIS ECM using fluorescent live animal imaging following a single subcutaneous

271 vaccine dose including either fluorescently labeled OVA protein or a CDA analogue (cGAMP,  
272 cyclic guanosine–adenosine monophosphate) [36]. In addition to soluble delivery with Saline, the  
273 inorganic vaccine adjuvant aluminum hydroxide (Alum) was used as a positive control due to its  
274 established effects as a depot for protein adsorption and widespread clinical usage [37]. SIS ECM  
275 extended the retention and release of the whole-protein antigen OVA. After a 2-3 day burst  
276 release phase, OVA signal slowly decreased to background over 30 days with only 50% release  
277 after 4 days (**Fig 5A,B and SFig 3A, B**). In comparison, soluble OVA protein was rapidly cleared  
278 from the injection site with almost 80% release after 4 days (**Fig 5A,B and SFig 3A, B**). The  
279 positive control Alum showed the slowest release with only 20% release after 4 days (**Fig 5A,B**  
280 **and SFig 3A, B**). These same trends were maintained with or without CDA delivery with OVA  
281 (**SFig 3A, B**). Conversely, release kinetics of the CDA analogue cGAMP was substantially more  
282 rapid than OVA in all groups, with total clearance (greater than 85%) within 4 days of soluble  
283 delivery with Saline (**Fig 5C,D and SFig 3C**). ECM did not significantly alter cGAMP release  
284 kinetics, though Alum did prolong release with only ~50% release after 4 days (**Fig 5C, D and**  
285 **SFig 3C**).



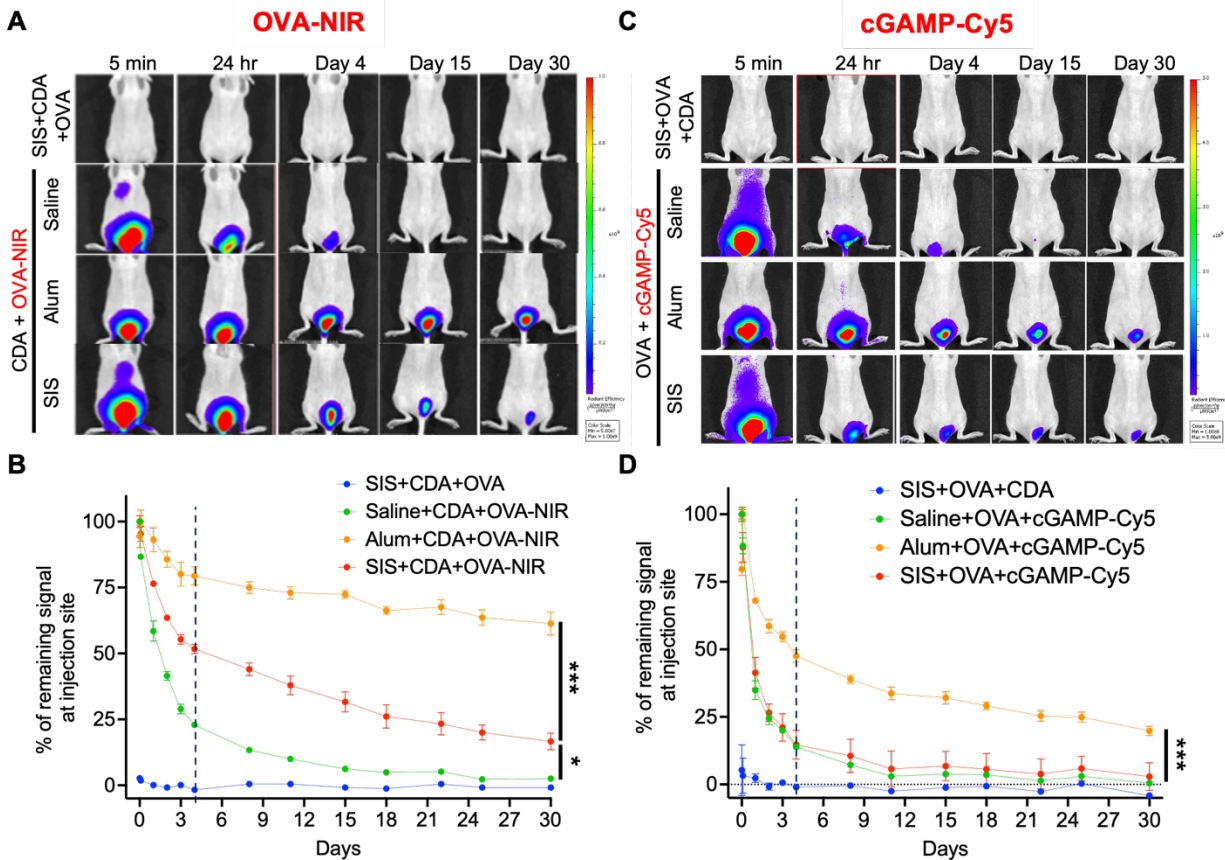

286

287 **Figure 5. In vivo vaccine release kinetics from SIS scaffolds via live animal fluorescence imaging.**  
 288 (A) Antigen retention was tracked using Licor800 NIR dye conjugated OVA protein when co-delivered  
 289 subcutaneously with CDA and either SIS ECM, Alum, or Saline control at the tail base of hairless  
 290 immunocompetent SKH1 mice. (B) Fluorescence flux from labeled OVA was quantified at the tail base and  
 291 normalized to initial signal (5 min post injection) over 30 days. (N=3, mean  $\pm$  SD) (C) Cyclic dinucleotide  
 292 retention was tracked using a Cy5 conjugate of the CDA analogue cGAMP co-delivered with unlabeled  
 293 OVA and each biomaterial condition. (D) Fluorescence flux from labeled cGAMP was quantified at the tail  
 294 base and normalized to initial signal (5 min post injection) over 30 days. (N=3, mean  $\pm$  SD). \* $p$  < 0.05, \*\*\* $p$   
 295 < 0.001, two-way ANOVA with Tukey's multiple comparisons test.

296

297 *An ECM scaffold assisted therapeutic cancer vaccine induces CD8+ T cell dependent tumor*  
 298 *regression and protective anti-tumor immune memory.*

299

300 We tested the efficacy of an ECM scaffold assisted vaccine to treat established tumors.

301 Ovalbumin expressing EG.7-OVA mouse lymphoma cells were injected subcutaneously in the

302 flanks of both young 8-week-old and mature 24-week-old C57Bl/6 mice and treated once the

303 tumors grew to 75-100 mm<sup>3</sup> and again 7 days later (**Fig 6A**). An ECM assisted cancer vaccine

304 was subcutaneously injected caudally to the tumor site using the same formulation used in the  
305 CTL assay (5 mg SIS, 20 µg CDA, 100 µg OVA), using Alum as a reference particulate material.  
306 A therapeutic SIS ECM scaffold assisted cancer vaccine induced curative lymphoma tumor  
307 regression in 57% of young mice (4/7), whereas soluble OVA and CDA delivery in Saline controls  
308 did not produce complete responses in any treated animals (0/6) (**Fig 6B, C, E**). Vaccination with  
309 Alum was similar to ECM with 50% regression (3/6) confirming the importance of material delivery  
310 to enhance therapeutic efficacy (**Fig 6B,C,E**). Tumor growth kinetics showed that SIS ECM  
311 delivery quickly induced tumor regression to undetectable sizes in all animals, though nearly half  
312 underwent local recurrence within 1 week of the second dose (**Fig 6B,D**). Saline delivery induced  
313 some tumor regression or growth stasis in most animals, and all experienced recurrence (**Fig 6B,**  
314 **D**). We also confirmed that CDA was necessary as an immune adjuvant as OVA delivery alone  
315 with ECM or Alum did not show any regression in the tumor growth kinetics (**SFig 4A,B**). Young  
316 immunologically naïve mice are useful models for immunology research, however, are still rapidly  
317 developing and do not reflect the macroenvironment of adults in which most cancers arise. Since  
318 age is a crucial variable in immunotherapy responsiveness [38], we tested SIS ECM scaffold  
319 vaccine efficacy in mature adult mice (24 weeks old) (**Fig 6F**). We found that SIS ECM scaffold  
320 vaccines were highly effective in mature mice, with 77% durable tumor regression (7/9 mice) (**Fig**  
321 **6G,H**). Recurrence occurred approximately 3 weeks after the second treatment dose. These  
322 results show that ECM can be used to enhance efficacy of a therapeutic vaccine efficacy in both  
323 young and mature adult mice.

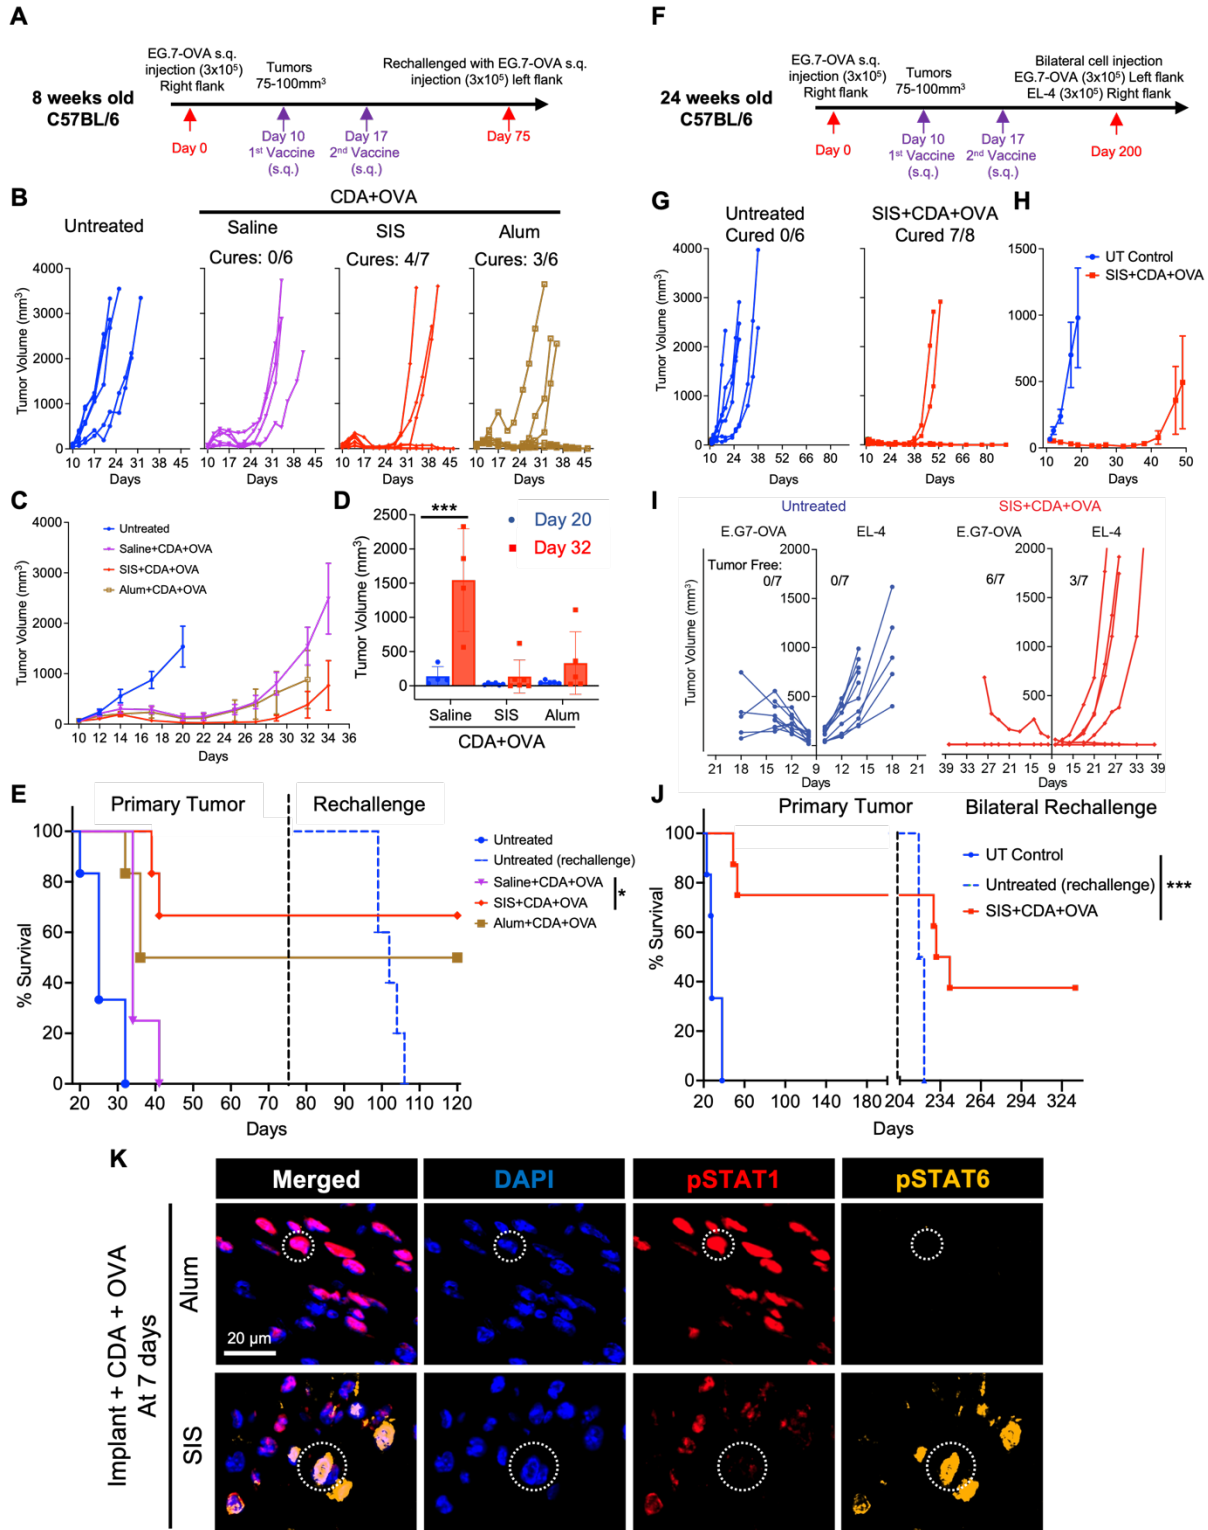

324

325 **Figure 6. Tumor regression and long-term protection following therapeutic SIS ECM scaffold**  
 326 **assisted vaccination of established tumors in young and adult-mature mice.** (A, F) Schematic timeline  
 327 of E.G7-OVA tumor induction, subcutaneous vaccination schedule using CDA and OVA antigen, and tumor  
 328 rechallenge in 8-week-old young and 24-week old adult mature C57Bl/6 mice. (B) Individual tumor growth

329 curves for scaffold assisted therapeutic vaccination, with cures defined as complete and durable tumor  
330 regression to a minimum of 75 days. (C) Average tumor growth kinetics and (D) quantification 20 and 32  
331 days after tumor induction as early and late responses. (N=6-7, mean  $\pm$  SEM). \*\*\* $p < 0.001$ , two-way  
332 ANOVA with Šidák's multiple comparisons test. (E) Impact of vaccination on overall survival and on  
333 rechallenge with EG.7-OVA cells on the contralateral flank. Log-rank (Mantel-Cox) test. (G) Individual tumor  
334 growth curves and (H) average tumor growth kinetics for scaffold assisted therapeutic vaccination, with  
335 cures defined as complete and durable tumor regression to a minimum of 200 days. (I) Individual tumor  
336 growth curves for scaffold assisted therapeutic vaccination upon bilateral rechallenge of E.G-OVA (Left  
337 flank) and EL-4 (Right flank) in primary tumor surviving mice. (J) Impact of vaccination on overall survival  
338 and on Bilateral rechallenge with EG.7-OVA and EL-4 cells. (N=6-8, mean  $\pm$  SEM), Log-rank (Mantel-Cox)  
339 test. (K) Multiplex immunofluorescent images showing phospho-STAT1 and phospho-STAT6 staining of  
340 subcutaneously injected SIS-Vax and Alum-Vax in C57Bl/6 mice 7 days post implantation (20X objective).

341

342 We performed a series of tumor rechallenge experiments to determine anti-tumor immunological  
343 memory generation in surviving mice exhibiting durable tumor regression. Young-vaccinated mice  
344 were rechallenged 75 days later with EG.7-OVA cells on the contralateral flank relative to the  
345 original tumor. All surviving mice from the SIS ECM and Alum vaccine treated groups were  
346 protected on rechallenge suggesting systemic immunological memory (**Fig 6E**). We performed a  
347 similar experiment in surviving mature-vaccinated mice but used a more aggressive bilateral  
348 rechallenge over 200 days post-implantation: EG.7-OVA tumor cells on the right contralateral  
349 flank and its parental lymphoma line EL-4 on the ipsilateral flank (**Fig 6F**). The goal of this  
350 rechallenge was to determine whether immunological memory persists long term (6 months) and  
351 to evaluate potential “epitope spreading” against non-OVA tumor antigens. Since EL-4 is the  
352 parental strain from which EG.7-OVA was derived, it shares a similar antigen landscape but  
353 without OVA protein. Both tumor lines rapidly grew in age-matched untreated control mice (**Fig**  
354 **6I**). SIS ECM vaccinated mature mice strongly rejected EG.7-OVA lymphoma cells in 85% of mice  
355 (6/7), demonstrating immune protection, and surprisingly, moderate protection against the non-  
356 OVA expressing EL-4 line in 42% of mice (3/7) (**Fig 6I**). This data suggests epitope spreading  
357 may be a compatible mechanism when vaccines are co-delivered with an ECM scaffold  
358 biomaterial. Young-vaccinated mice underwent a similar bilateral rechallenge (**SFig 4C, D**) over  
359 150 days after the first rechallenge. All mice in each of the SIS ECM (N=4) and Alum (N=3)

360 vaccine groups were protected from EG.7-OVA cells, however, only 1 Alum vaccine mouse  
361 demonstrated protection against EL-4 (**SFig 4E**). Similar tumor cure rates and long-term memory  
362 was observed for both SIS ECM and Alum despite their disparate compositions. We compared  
363 the local cytokine signaling milieu between materials to characterize differences in their immune  
364 environments and to determine if these were preserved in the complete vaccine composition (both  
365 CDA and OVA). We found that vaccine co-delivery triggered STAT1 phosphorylation in the SIS  
366 ECM microenvironment (induced by interferon signaling) after 7 days (**Fig 6K**), comingled with  
367 cells exhibiting STAT6 phosphorylation (induced by IL-4 signaling) induced by SIS ECM alone  
368 (**SFig 4F**). In contrast, cells responding to Alum showed STAT1 activation with rare STAT6  
369 phosphorylated cells. These show that local IL-4 signaling is compatible with cytotoxic immune  
370 generation and that SIS ECM and Alum generate different immune environments to produce a  
371 similar functional outcome.

372

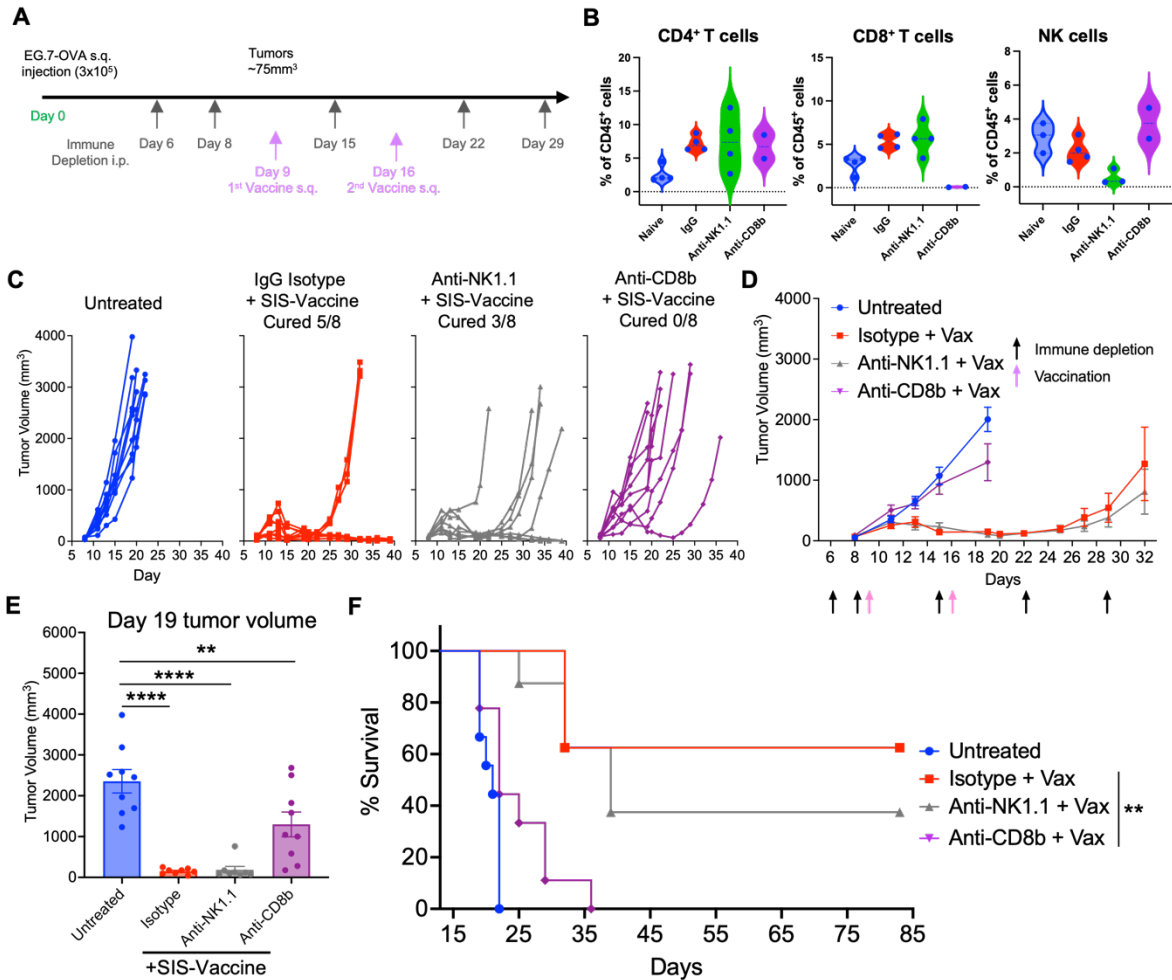

373

374 **Figure 7. ECM vaccine efficacy following antibody mediated cytotoxic effector cell depletion.** (A)  
 375 Schematic timeline of EG.7-OVA tumor induction, antibody mediated cell depletion schedule, and  
 376 vaccination schedule using CDA and OVA with SIS ECM. (B) CD8 cytotoxic T cell and NK cell depletion  
 377 was verified with flow cytometry analysis of peripheral blood. (N=2-4) (C) Individual tumor growth curves  
 378 with SIS ECM vaccination following each depletion condition, (D) average tumor growth, and (E) tumor  
 379 volume at 19 days and (F) survival analysis. (N=8, mean  $\pm$  SEM). \* $p < 0.05$ , \*\* $p < 0.01$ , \*\*\*\* $p < 0.0001$ , one-  
 380 way ANOVA with Tukey's multiple comparisons test. Survival comparison Log-rank (Mantel-Cox) test.

381

382 After demonstrating efficacy of an ECM therapeutic cancer vaccine, we then sought insights into  
 383 the mechanism of tumor regression and immune protection, and to determine whether functional  
 384 cytotoxic anti-tumor immunity was indeed being generated by ECM scaffold vaccine delivery.  
 385 Cytotoxic effector cells were depleted via intermittent systemic administration of monoclonal  
 386 antibodies beginning prior to therapeutic vaccination in EG.7-OVA bearing mice and maintained

387 throughout the experiment: anti-CD8b (cytotoxic T cells), anti-NK1.1 (cytotoxic NK cells), isotype  
388 negative controls (IgG1), or untreated (**Fig 7A**). Depletion efficiency was greater than 95% for  
389 cytotoxic T cells and 81% for NK cells in peripheral blood and the spleen, and depletion alone did  
390 not affect primary tumor growth (**Fig 7B, SFig 5A-D**). Tumor regression by SIS ECM vaccine  
391 delivery was completely abrogated with CD8b targeted depletion (0/8 cured) showing that  
392 cytotoxic T cells are essential effectors (**Fig 7C-F**). NK cell depletion variably influenced vaccine  
393 with loss of potency in 25% of mice (3/8 cured) in comparison to isotype control (5/8 cured) (**Fig**  
394 **7C-F**). This suggests that both CD8 and NK cells contribute to anti-tumor immunity, and that  
395 CD8+ cytotoxic T cells are the more essential and potent effectors for tumor control with ECM  
396 vaccine delivery.

397

#### 398 **Discussion:**

399 We found that injectable decellularized ECM scaffolds enhance therapeutic cancer vaccine  
400 efficacy when combined with the appropriate immune adjuvant. ECM scaffolds infused with tumor  
401 protein antigen and the STING agonist CDA enhanced antigen-specific cytotoxic T cell immunity,  
402 induced curative regression of established tumors, and generated protective anti-tumor memory.  
403 ECM scaffolds were inherently immune modulatory, locally recruiting macrophages and antigen  
404 presenting cells to the local vaccination site, and prolonged antigen retention. With the addition  
405 of immune adjuvant this inflammation remained localized and resolved without adverse events  
406 such as systemic toxicity, autoimmunity, or local tissue damage demonstrating safety. Further,  
407 cytotoxic immune activation against tumor antigen were orthogonal to IL-4 cytokine signaling  
408 elicited by ECM scaffold materials as hallmarks of the pro-regenerative immune response. These  
409 results show that alternative forms of biomaterial inflammation are conducive to cytotoxic targeting  
410 immunotherapy and is not limited to synthetic scaffolds that stimulate inflammation characteristic  
411 of the foreign body reaction.

412

413 Local leukocyte recruitment to injectable scaffolds carrying cancer vaccine is an important  
414 mechanism for augmenting immune recognition. We confirmed that SIS ECM particles triggered  
415 a robust immune infiltrate at the vaccination site, and that these cells were capable of internalizing  
416 exogenous antigen (**Fig 1H**). Total cell densities in response to SIS ECM were qualitatively similar  
417 to previous reports of subcutaneously implanted ECM [10, 13, 39], with a peak in macrophage  
418 recruitment within 1 week of implantation. Macrophages are critical mediators of ECM scaffold  
419 remodeling during tissue repair and are among the most well-studied cell type in the ECM host  
420 response, though we identified additional vaccine-relevant dynamics that had not been previously  
421 described. Of interest were APCs, which are required for vaccine antigen uptake and subsequent  
422 T cell priming via co-stimulatory ligands such as CD86. Surprisingly, APC recruitment to SIS ECM  
423 scaffolds peaked early (1 day post implantation) and had decreased substantially by 7 and 14  
424 days, which closely followed Ly6G<sup>+</sup> neutrophil dynamics. Additionally, we found instances of  
425 intracellular Ly6G within APCs suggesting neutrophil efferocytosis (clearance of apoptotic cells).  
426 Previous studies showed that neutrophils were not essential to ECM scaffold mediated muscle  
427 repair [27], though efferocytosis can contribute to downstream T cell function during infection [40].  
428 SIS ECM displayed an adjuvant-like effect by recruiting numerous immune cells however, this  
429 immune response alone did not consistently generate functional cytotoxic T cell responses in a  
430 CTL assay (**Fig 4G**), which motivated co-delivery with exogenous adjuvants to stimulate this  
431 branch of adaptive immunity.

432

433 We subsequently identified adjuvant interactions with the SIS ECM immune response that  
434 informed optimal vaccine design. Combining scaffold with adjuvant is ideally synergistic wherein  
435 the scaffold immune response attracts leukocytes that are then stimulated by locally high  
436 concentrations of immune adjuvant. Since the duration, intensity, and phenotype of immune  
437 response varies with scaffold composition, we hypothesized that the optimal adjuvant varies with  
438 biomaterial type. This approach has identified promising candidates for alginate cryogels,



439 inorganic silica rods, porous polyesters, and hydrogels [17, 18, 41-43], though there has been  
440 limited investigation in ECM biomaterials that create a unique and disparate immune Type 2-  
441 biased environment. We found that the TLR4 agonist MPLA induced the strongest local  
442 inflammatory reaction with ECM delivery that remained elevated for weeks after injection. Despite  
443 MPLA creating an infection-like local environment (**Fig 3**) with SIS ECM, antigen specific cytotoxic  
444 function was attenuated compared to the soluble adjuvant alone. This shows that the local  
445 scaffold environment can be antagonistic to specific adjuvants and that chronically elevated  
446 inflammation alone is not predictive of cytotoxic immunity. Likewise, the cytokine GM-CSF did not  
447 convey a substantial benefit to APC recruitment or increase cytotoxic activity with SIS ECM co-  
448 delivery despite increasing cellularity. Rather, the most prominent effect of GM-CSF was to  
449 increase the acute (1 day) neutrophil response. GM-CSF is often used in combination with other  
450 factors to mobilize, attract, and mature APCs at a vaccination site to increase immune recognition  
451 in both cell-based and scaffold-assisted vaccine designs alike [16, 17, 34]. ECM scaffolds alone  
452 already efficiently attract myeloid cells and promote expression of similar cytokines [10], thus  
453 diminishing the role of GM-CSF to potentiate recruitment. This highlights that the same adjuvant  
454 may display different activities based on biomaterial type. In contrast to MPLA and GM-CSF, the  
455 STING agonist CDA nominally affected the acute inflammatory response and was the most potent  
456 cytotoxic inducing adjuvant. CDA was previously shown to be an effective cancer vaccine  
457 adjuvant [30, 44, 45], though have yet to achieve that success clinically [46]. CDA is recognized  
458 intracellularly by STING expressed by immune and non-immune cells, which then triggers Type I  
459 interferon expression to promote T cell survival and expansion [47].

460  
461 Prolonging vaccine antigen exposure is another mechanism to increase vaccine efficacy in ECM  
462 scaffold materials. ECM contains native protein binding motifs that sequester soluble factors (such  
463 as cytokines and growth factors) to extend their half-life and enhance activity, and these  
464 properties can be preserved in decellularized tissues [48-50]. We found that OVA protein retention

465 was indeed enhanced compared to soluble delivery, possibly via such binding interactions.  
466 Conversely, the adjuvants used in the present study have different chemical properties. The cyclic  
467 dinucleotide CDA (and analogous cGAMP used for in vivo tracking) is a small molecule that lacks  
468 hydrophobic or positively charged domains that may be important to ECM binding and are thus  
469 quickly released. The inorganic salt Alum retained both OVA and CDA at the injection site to a  
470 greater extent than ECM, though this did not produce a therapeutic benefit suggesting SIS ECM  
471 binding affinity was sufficient in the context of vaccination. Further, a substantial proportion of  
472 vaccine signal was identified in Alum over 30 days after injection, which is beyond the optimal  
473 time scale for T cell priming.

474  
475 Immune modulation and sustained antigen release may both contribute to the observed synergy  
476 between vaccine delivery and the SIS ECM scaffold microenvironment leading to complete  
477 regression of established tumors that is not achievable with soluble vaccine components alone.  
478 We further established the magnitude of anti-tumor immunity and investigated mediators of the  
479 ECM scaffold-assisted vaccine response. Therapeutic cancer vaccination is a more clinically  
480 relevant but more challenging model than prophylactic vaccines (delivered before tumor  
481 formation) due to the immune suppressive tumor microenvironment that dampens efficacy. Our  
482 CTL assay results showed that very low doses of CDA are sufficient to prime OVA antigen specific  
483 immunity, yet even a high dose of CDA in a soluble vaccine was ineffective when treating  
484 established tumors (**SFig 2B**). Additional cell types or soluble factors may be required to  
485 overcome tumor microenvironmental barriers. NK cells are a promising candidate as our cell  
486 depletion studies showed that while cytotoxic T cells were strictly required, NK cells may  
487 contribute to influence reliability. Ultimately, our SIS ECM scaffold-assisted vaccine formulation  
488 exceeded efficacy reported in many prophylactic and therapeutic EG.7-OVA vaccine models [16,  
489 51-53]. Protection from tumor rechallenge several months after vaccination bolsters the  
490 importance of adaptive immunity and provides evidence of long-lived memory lymphocyte

491 generation that are positively associated with durable immunotherapy responses in the clinic [54].  
492 SIS ECM scaffold assisted vaccination responsiveness improved with age, which agrees with  
493 certain clinical cancer subtypes such as melanoma [38]. In addition to improved response rates  
494 in the primary tumor, vaccination also provided partial protection from the parental lymphoma  
495 strain EL4 suggesting evidence of epitope-spreading. Additional validation is required but it is  
496 plausible that dying EG.7 cells are releasing non-OVA tumor antigens shared with EL4 that are  
497 also being presented by APCs to expand the T cell repertoire beyond the vaccine. Epitope  
498 spreading has important clinical implications as it overcomes antigen-escape mechanisms of  
499 resistance to targeted immunotherapies wherein cancer cell clones downregulating tumor antigen  
500 emerge [55].

501

502 A key finding of this work is that the pro-healing Type 2-like ECM scaffold immune environment  
503 can be used to augment cytotoxic anti-tumor immunity. Traditionally, Type 2 immunity is often  
504 considered antagonistic to T cell mediated cancer immunotherapy. For example, Th2 polarized T  
505 cells are enriched in breast tumor subsets and correlated with poor outcomes [56]. However, this  
506 paradox is tempered by previous studies that demonstrate contextual importance. We previously  
507 showed that ECM scaffold immune environments inhibited local melanoma tumor formation *in*  
508 *vivo* via a T cell and macrophage dependent mechanism, providing proof-of-principle that ECM  
509 scaffolds can promote anti-tumor immunity [10]. Furthermore, Type 2 cytokines such as IL-4 are  
510 pleiotropic and can assist cytolytic immunity in cell-based immunotherapy [57, 58]. Other features  
511 of the ECM immune response are more complex such as hybrid M1/M2 macrophage population  
512 that is phenotypically distinct from immune suppressive tumor macrophages [10]. Interestingly,  
513 the adjuvants we tested did not diminish these Type 2 like signatures, for example *Il4* gene  
514 expression in lymph nodes or STAT6 signaling in the scaffold microenvironment, suggesting that  
515 these immune states can co-exist. The molecular mechanisms of how biomaterials modulate local  
516 immunity *in vivo* is an area of active study, though cellular participants differentiate ECM

517 biomaterials from synthetic polymeric or inorganic materials that drive the chronic foreign body  
518 reaction. Persistent neutrophils, Th17 cells, and multinucleate giant cells that accumulate around  
519 non-degradable polymers are absent in the ECM response. We showed that both ECM and the  
520 inorganic particulate salt Alum enhanced therapeutic tumor regression despite these fundamental  
521 differences in immune environment, and additional analyses are necessary to understand  
522 whether ECM scaffold specific features are productive or detrimental to immunotherapy.

523

524 This study shows that ECM scaffolds prepared from decellularized tissues can enhance cytotoxic  
525 T cell priming and improve the efficacy of a therapeutic cancer vaccine when using an appropriate  
526 immune adjuvant. Cyclic di-AMP (CDA) induced systemic antigen-specific cytotoxic T cell  
527 immunity *in vivo* while not significantly altering immune features that are important to ECM  
528 scaffold remodeling. Cytotoxic immunity translated to tumor regression in established tumor  
529 microenvironments when used as a therapeutic vaccine. The ECM scaffold immune environment  
530 can therefore be synergistic with cancer immunotherapy and is a promising addition to treatment.  
531 This expands the toolbox for scaffold-assisted cancer vaccine delivery to include biomaterials that  
532 can be applied to promote healing during tissue reconstruction and to merge fields of tissue  
533 engineering and cancer immunology.

534

535 **Acknowledgements.** This research was supported by the Intramural Research Program of the  
536 NIH, National Cancer Institute, CCR, Cancer Innovation Laboratory. S.P. and M.T.W. assisted in  
537 conceptualization, experimental design, performing experimental procedures, and in  
538 writing/editing the manuscript. R.C. assisted with experimental design and performing  
539 experimental procedures. I.B. assisted with experimental procedures and data analysis. B.J.H.  
540 assisted in experimental design and intellectual feedback. B.N. assisted with animal procedures.  
541 The authors thank Dan McVicar, David Wink, Stephen Anderson, Howard Young, Joost

542 Oppenheim, Ji Ming Wang, and Scott Durum of the Cancer Innovation Laboratory for enlightening  
543 discussions.

544

545 **Methods:**

546 ***Small intestinal submucosa (SIS) decellularization and cryogenic milling***

547 Normal porcine small intestine was obtained from Tissue Source LLC (Zionsville, IN) from market  
548 weight pigs that were documented as pathogen free (porcine reproductive and respiratory  
549 syndrome, porcine epidemic diarrhea virus, porcine delta coronavirus, transmissible  
550 gastroenteritis) and complied with ISO 13485. Intestines were flushed of their contents and cut  
551 open along its length then mechanically delaminated to remove the muscularis and mucosal  
552 layers. The resulting submucosa was cut into 6 inch pieces and decellularized using 4%  
553 alcohol/0.1% peracetic acid (v/v, Sigma-Aldrich) and washed thoroughly with 1X PBS and Type  
554 1 water followed by lyophilization and comminuted into an injectable particulate form via cryogenic  
555 milling and sieving through 425  $\mu\text{m}$  pore sieve. SIS particles were terminally sterilized via  $2 \times 10^6$   
556 rad gamma irradiation on dry ice. Particles were tested as negative for murine viral and bacterial  
557 pathogens.

558

559 ***DNA quantification in decellularized SIS-ECM particles***

560 The DNA was isolated from lyophilized porcine native small intestine (SI) and decellularized SIS  
561 ECM particles using DNeasy Blood & Tissue Kit according to manufacturer's protocol. Briefly,  
562 minced lyophilized native SI and SIS ECM particles were digested with proteinase K in ATL buffer  
563 at 56°C. Once tissue was completely digested by visual inspection, AL buffer was added and  
564 incubated at 56°C for 10 minutes followed by 100% ethanol. The samples were loaded onto  
565 DNeasy Mini Spin columns and centrifuged at 8000g for 1 minute. The column was washed with  
566 AW1 and AW2 buffer, and DNA was eluted with 200 $\mu\text{L}$  of AE buffer with centrifuging at 8000g for  
567 1 minute. Isolated DNA was quantified using Quant-iT PicoGreen dsDNA Assay Kits according to

568 manufacturer's protocol. Briefly, 100 $\mu$ L of diluted DNA samples were added in triplicate into 96  
569 well plate followed by addition of 100 $\mu$ L of Quant-iT PicoGreen reagent. The plate was incubated  
570 for 5 minutes at room temperature in the dark and fluorescence emission at 520 nm quantified  
571 after 480 nm excitation using a plate reader (Spectramax i3, Molecular Devices).

572

### 573 ***Scanning electron microscopy and SIS particle size quantification***

574 The SIS particles were scattered onto aluminum SEM stubs and sputter coated with either 5 nm  
575 thick gold-palladium 30mA for 30second or 4.5 nm thick iridium 30mA for 30 seconds using a  
576 K575X sputter coater (EMITECH, Quorum). Images were acquired with Hitachi S-4500 field  
577 emission SEM and processed using Quartz PCI (v9) software. Size quantification from 9 separate  
578 images with multiple fields of view was manually conducted by blinded observers at the NCI  
579 Frederick EM facility (Electron Microscopy Laboratory).

580

### 581 ***Mice***

582 Female 7-week old C57Bl/6J mice and SKH-1 hairless mice were obtained from The Jackson  
583 Laboratory and housed at the NCI Frederick Laboratory Animal Sciences Program in specific  
584 pathogen-free conditions and under 12-hour light/dark cycles. Ethical approval for the animal  
585 experiments was provided by the Institutional Animal Care and Use Committee at NCI Frederick  
586 (Protocol No. 20-063). Mice acclimated to housing conditions for one week prior to experimental  
587 procedures. Mice were euthanized via asphyxiation with carbon dioxide and cervical dislocation.

588

### 589 ***Subcutaneous SIS ECM injection and tissue collection***

590 SIS-ECM particles were hydrated with saline to form an injectable suspension. Each SIS ECM  
591 dose consisted of 5 mg of SIS particles hydrated with 100  $\mu$ L of saline for a minimum of 30 minutes  
592 and intermittent vortexing. For studies into the effect of immune adjuvant on SIS ECM immune  
593 environment, adjuvants were first prepared in saline and then used to hydrate SIS particles as

594 described above for 20 µg CDA, 10 µg MPLA, or 1 µg GM-CSF per SIS ECM dose. For antigen  
595 and vaccine studies, 100 µg of OVA protein was included per dose.

596 SIS ECM particles were subcutaneously injected in the right flank of C57Bl/6 mice for  
597 immune response characterization and vaccine studies, or at the tail base for live animal imaging.  
598 Briefly, the injection area was shaved and disinfected with alcohol and 100 µL of SIS ECM particle  
599 suspension injected (day 0) with or without the described vaccine components. Immune  
600 characterization studies were performed 1, 7, or 14 days post implantation. Mice were  
601 anesthetized with 2% isoflurane for blood collection via cheek bleeds starting 1 day before SIS  
602 ECM implantation (baseline) and then prior to euthanasia at each time point. SIS ECM scaffolds  
603 and adjacent subcutaneous tissues were harvested for fixation in 10% neutral buffered formalin  
604 for a minimum of 48 hours. Lymph nodes after 7 and 14 days were snap frozen on dry ice for  
605 PCR analysis.

606

#### 607 ***Histologic analysis and multiplex immunofluorescence staining***

608 SIS ECM scaffolds and nearby skin was explanted to ensure that the SIS implant was intact.  
609 Explants were carefully trimmed and cut into two halves from the midline over the implant and cut  
610 faces were embedded into paraffin for sectioning. Formalin fixed tissues were dehydrated with a  
611 graded series of ethanol and xylene for paraffin embedding, sectioned (5 µm), and stained for  
612 H&E as per standard protocols (Histoserv, Inc.). H&E stained implants were imaged using a Zeiss  
613 AxioObserver using a 20X objective (high resolution) or 10X objective tiled images.  
614 Immunofluorescence staining and imaging was performed to characterize immune cell infiltrate  
615 within SIS ECM scaffolds in combination with vaccine components. For all stains, sections were  
616 deparaffinized in xylene followed by rehydration in decreasing concentration of ethanol and then  
617 in Type I water. Rehydrated sections were post-fixed with neutral buffered formalin for 15 min  
618 followed by PBS wash with Type I water. Antigen retrieval of tissue sections was performed in  
619 citrate buffer (pH 6.0) for 20 min at 95-98°C using a steamer and cooled at RT for 20 minutes

620 followed by washing with Type I water. Endogenous peroxidases were quenched by incubating  
621 the slides in 3% H<sub>2</sub>O<sub>2</sub> in PBS for 15 minutes. Slides were washed with Type I water and a border  
622 was created around the section using PAP pen. Unreacted aldehydes were quenched with 2.24%  
623 (0.3M) Glycine (w/v) in TBS-T buffer (Tris Buffered Saline with 0.05% Tween-20) for 5 minutes  
624 followed by blocking using 10% BSA in TBS-T for 30 min at room temperature.

625 Sections were sequentially stained via tyramide signal amplification with full reagent  
626 information can be found in Table 1. In brief, each round of staining consisted of incubation with  
627 primary the antibody diluted in blocking buffer, 3 washes in TBS-T, incubation with species  
628 appropriate HRP-Polymer conjugated anti-IgG secondary for 15 minutes at room temperature  
629 (RT), 3 washes in TBS-T, incubation with Opal dye diluted in Opal amplification diluent (Akoya),  
630 and 2 water washes. Antibody stripping was performed between rounds using citrate buffer (pH  
631 6.0) for 20 min at 95-98°C. After the final round, slides were counterstained with DAPI (1µg/ml) in  
632 PBS for 5 min followed by water washes and cover slipping with fluorescent antifade mounting  
633 reagent (DAKO, Agilent).

634 For myeloid staining, primary antibody labeling conditions and Opal dye pairs were applied  
635 in the following order: (1) F4/80 at 1:500 dilution overnight at 4°C and Opal 570 at 1:150 dilution,  
636 (2) CD86 at 1:500 dilution for 30 minutes at room temperature and Opal 650 at 1:150 dilution, (3)  
637 Ly6G at 1:2000 dilution for 30 minutes at room temperature and Opal 520 at 1:150 dilution.

638 Minor staining modifications were applied for phospho-STAT staining; antigen retrieval  
639 was performed with pH 8.0 Tris-EDTA and PBS buffer steps were replaced with TBS or water.  
640 Primary antibody labeling conditions and Opal dye pairs were: (1) pSTAT6 at a 1:200 dilution  
641 overnight at 4°C and Opal 570 at a 1:150 dilution, (2) pSTAT1 at a 1:500 dilution overnight at 4°C  
642 and Opal 650 at a 1:500 dilution.

643

644 ***Whole slide imaging and computational pathology***



645 The whole slide fluorescent images were evaluated for the quantification and characterization of  
646 immune cell infiltrates immunolabeled for Ly6G, F4/80, and CD86 antibodies. Whole Slide  
647 Imaging was performed using an Aperio fluorescent scanner (Leica Biosystems, Wetzlar,  
648 Germany) with a 20x objective to detect DAPI, Opal 520, Opal 570, and Opal 650. Image  
649 deconvolution, annotations, cell detection, and threshold determination was performed using the  
650 opensource QuPath software package (v0.3.3). Annotations were created by a board-certified  
651 pathologist to include implant border, interface, and core; the interface was defined as 200  $\mu$ m  
652 concentrically from the border, and the core as greater than 200  $\mu$ m towards the center. Cell detection  
653 was performed using pretrained StarDist convolutional neural networks.

654

#### 655 ***Quantitative real time PCR of lymph node cytokine expression***

656 The RNA from draining LN (dLN) was isolated using Qiagen RNeasy micro kit according to  
657 manufacturer's protocol. Briefly, the dLN was crushed in liquid nitrogen and 0.5mL Trizol was  
658 added to it. 0.1mL of chloroform was added to the sample tube and vortexed vigorously for 15  
659 seconds. The tubes were centrifuged at 12000g for 15 minutes at 4°C and upper aqueous layer  
660 was taken out in a 1.5mL tube. 0.25mL isopropyl alcohol was added to the tube and incubated  
661 for 10 minutes. The solution was loaded onto RNeasy MinElute spin column and eluted in RNase-  
662 free water. The RNA concentration and purity was confirmed using Qubit RNA high sensitivity  
663 assay kit and RNA integrity and quality assay Kit. 2.0 $\mu$ g of the isolated RNA was reverse  
664 transcribed to cDNA using SuperScript IV VILO master mix (Invitrogen) according to  
665 manufacturer's protocol. The RNA and cDNA were stored at - 80°C till use.

666 RT PCR was performed in triplicate to quantify the gene expression of Il4 and Ifny from  
667 cDNA of dLN using TaqMan Gene expression assay. Briefly, the TaqMan gene expression master  
668 and TaqMan Assay and cDNA was added in LightCycler 480, 96 well plate. The reaction plate  
669 was sealed with adhesive film and centrifuged to collect the contents at the bottom. The sealed  
670 plate was run in Roche LightCycler 480 Instrument II and programmed according to the

671 manufacturer's instruction. The fold change in gene expression was calculated using the  $2^{-\Delta\Delta Ct}$   
672 method.

673

#### 674 ***Plasma cytokine analysis***

675 The PROCARTAPLEX 21 PLEX kit (Thermo Fisher Scientific, SKU# PPX-21) was used to  
676 quantify the various cytokines from mice plasma (Table 2 from SI). The plasma was run by  
677 Frederick National Laboratory core facility according to the manufactures protocol on Luminex  
678 FLEXMAP 3D instrument and the results were analyzed by Bio-Plex Manager software.

679

#### 680 ***In vivo cytotoxic T-lymphocyte (CTL) assay***

681 The cytotoxic T-lymphocyte (CTL) assay was performed to assess the functional output of cellular  
682 mediated immunity against ovalbumin as a model antigen in vaccinated mice. Briefly, 6-8 weeks  
683 old female C57Bl/6 mice were vaccinated with SIS+Adjuvant+ovalbumin (OVA; 100µg) on day 0  
684 followed by a booster on day 7. On day 13, spleens were isolated from naïve C57Bl/6 mice in  
685 RPMI media on ice and diced into small pieces and digested using Liberase TL (0.25 mg/ml) and  
686 DNase (0.2 mg/ml) in 5mL RPMI for 15 min at 37°C on shaker. The digestion mixture was grinded  
687 through 70µm cell strainer into 50 ml conical using syringe plunger and cold PBS was passed to  
688 rinse out cells. Splenocytes were centrifuged at 300g for 5 min at 4°C, and pelleted cells were  
689 washed with cold PBS. The splenocytes pellet was resuspended in 5mL 1X RBC lysis buffer for  
690 3 minutes on ice followed by two washes with cold PBS. The splenocytes were divided into two  
691 tubes of 10 million cells each. The first tube was labelled with High concentration of Celltracer  
692 Violet dye (25µg/mL) and second tube splenocytes were labelled with low concentration of  
693 Celltracer Violet dye (2.5µg/mL) by incubating at for 20 mins at 37°C in dark. The unbound dye  
694 was quenched by addition of RPMI media with 10% FBS in 1:1 ratio and washed twice with PBS  
695 by centrifuging cells at 300g for 5 minutes at 4°C. The splenocytes labelled with high concentration  
696 of dye were pulsed with SIINFEKL peptide (2µg/mL) of ovalbumin and low concentration labelled

697 cells were pulsed with scrambled FILKSINE peptide (2µg/mL) of ovalbumin for 30 minutes at 37°C  
698 and washed twice with PBS by centrifuging cells at 300g for 5 minutes at 4°C. One million cells  
699 were taken from each tube as reference control for analysis by flow cytometry. The cells from two  
700 tubes were mixed into 1:1 ratio and intravenously transferred into the previously vaccinated mice  
701 (10x10<sup>6</sup> cells/mice). On day 14, the mice were euthanized and splenocytes were isolated as  
702 describe above. The splenocytes were run on the Cytex Aurora Spectral Flow Cytometer followed  
703 by analysis on SpectroFlo® software. Specific killing was calculated using the following equation:

$$704 \quad 1 - \left[ \frac{\{(\% \text{ of Antigen positive cells}) / (\% \text{ of Antigen negative cells})\}_{immunized}}{\{(\% \text{ of Antigen positive cell}) / (\% \text{ of Antigen negative cells})\}_{non immunize}} \right] * 100$$

705

### 706 ***Ovalbumin fluorescent labeling***

707 Ovalbumin protein was fluorescently labeled for live animal imaging studies using amine reactive  
708 IRDye 800-NHS ester (LI-COR). Protein and dye were mixed at a 1:1 equimolar ratio in 2mL 1X  
709 PBS (pH 8.4) at RT with continuous mixing for an hour. Labeled protein was purified using Amicon  
710 filters (10K MWCO) by centrifugation at 3700g for 10 minutes and washing with 1X PBS. The  
711 degree of protein labeling was quantified by absorption at 280nm and 774nm using Nanodrop.

712

### 713 ***In-vivo release quantification of OVA and CDA using live animal imaging***

714 We used hairless SKH-1 mice for live animal imaging on IVIS Spectrum In vivo Imaging System  
715 (Perkin Elmer). For ovalbumin quantification: The SKH-1 mice were injected at tail base with  
716 100µL of (i) SIS+CDA+OVA, (ii) Saline+OVA-NIR, (iii) Saline+CDA+OVA-NIR, (iv) SIS+OVA-NIR,  
717 (v) SIS+CDA+OVA-NIR and (vi) Alum+OVA-NIR and (vii) Alum+CDA+OVA-NIR. The mice were  
718 imaged at 5 minutes, 2 hours, 6 hours, daily during 1st week and twice a week for following 3  
719 weeks and once in 4th week. The images were quantified using Living Image software.

720 For quantifying the CDA analogue cGAMP: The SKH-1 mice were injected at tail base  
721 with 100µL of (i) SIS+OVA+CDA, (ii) Saline+OVA+cGAMP-Cy5, (iii) SIS+OVA+cGAMP-Cy5 and

722 (iv) Alum+OVA+cGAMP-Cy5. The mice were imaged at 5 minutes, 2 hours, 6 hours, daily during  
723 1st week and twice a week for following 3 weeks and once in 4th week. The images were  
724 quantified using Living Image software.

725

### 726 ***Therapeutic vaccination in E.G7-OVA lymphoma tumor bearing C57Bl/6 mice***

727 A therapeutic cancer model was used to evaluate the efficacy of SIS+CDA as cancer vaccine  
728 against E.G7-OVA lymphoma tumor model. The E.G7-OVA cell lines are derived from EL4  
729 lymphoma cell line that produces ovalbumin and ovalbumin have been used as model antigen to  
730 target cancer cells. Briefly, 6-8 weeks old female C57Bl/6 mice (young mice) and 22-24 weeks  
731 old female C57Bl/6 mice (mature mice) were inoculated on the right flank with  $0.3 \times 10^6$  E.G7-  
732 OVA cells and once the tumor volume reached around 75-100 mm<sup>3</sup> the mice were randomized  
733 into different treatment groups followed by a booster dose after 7 days. Group 1 mice were  
734 untreated control, Group 2 mice were injected with 100  $\mu$ L Saline+OVA (100  $\mu$ g OVA)  
735 subcutaneously near the tumor site. Group 3 mice were injected with 100 $\mu$ L of SIS+OVA (5 mg  
736 SIS; 100 $\mu$ g OVA) and Group 4 mice received 100 $\mu$ L of Saline+CDA+OVA (20 $\mu$ g CDA; 100 $\mu$ g  
737 OVA). Group 5 mice were injected with 100 $\mu$ L of SIS+CDA+OVA (5mg SIS; 20 $\mu$ g CDA; 100 $\mu$ g  
738 OVA). We used Alum (Alhydrogel® 2% Aluminium Hydroxide Gel adjuvant) as reference for  
739 synthetic material in Group 6 where we injected 100 $\mu$ L of Alum+OVA (100 $\mu$ g OVA) and Group 7,  
740 100 $\mu$ L of Alum+CDA+OVA (20 $\mu$ g CDA; 100 $\mu$ g OVA). The mice tumor volume was measured 3  
741 time a week and monitored for survival till 75 days post primary tumor cell injection. A series of  
742 rechallenge experiments were performed on the mice which rejected the tumor and became tumor  
743 free. The first rechallenge was given on Day 75, by injecting  $0.3 \times 10^6$  E.G7-OVA tumor cells on  
744 the contralateral side (left flank) of the primary challenge with an aged matched untreated control  
745 mice. The second tumor rechallenge experiment was performed in the tumor free mice 233 days  
746 after initial tumor implantation with bilateral injection of  $0.3 \times 10^6$  EG.7-OVA tumor cells on one left

747 flank and its parental lymphoma line EL-4 on the right flank. The mice tumor volume was  
748 measured 3 time a week and monitored for survival.

749

750 ***Immune depletion in therapeutically vaccinated with ECM assisted vaccine in E.G7-OVA***  
751 ***lymphoma tumor bearing mice.***

752 The immune cell depletion was performed to determine the effector immune responsible for anti-  
753 tumor immunity. We used the E.G7-OVA tumor model as describe in previous section for this  
754 study. We used anti-CD8b antibody to deplete cytotoxic T cells, anti-NK1.1 antibody to deplete  
755 cytotoxic NK cells, and IgG antibody was used as isotype negative controls (Table 3 SI).

756 Briefly, we used 6-8 weeks old female C57Bl/6 mice and inoculated with  $0.3 \times 10^6$  E.G7-  
757 OVA cells on the right flank and randomized the mice with palpable tumor into different groups  
758 and administered two I.V injection of the above mentioned antibodies on day 6 and day 8 post  
759 tumor injection and once weekly for the next three weeks to maintain the deletion. Group 1 mice  
760 were untreated control, Group 2 mice were injected with 100  $\mu$ L Anti-IgG antibody (100  $\mu$ g)  
761 intraperitoneally (i.p). Group 3 mice were injected with 100 $\mu$ L anti-NK1.1 antibody (100 $\mu$ g) and  
762 Group 4 mice received 100 $\mu$ L of anti-CD8b antibody (100 $\mu$ g). Once the tumor volume reached  
763 around 75-100 mm<sup>3</sup> all the mice in from Group 2 to Group 4 were injected with SIS-ECM assisted  
764 vaccine, SIS+CDA+OVA (5mg SIS; 20 $\mu$ g CDA; 100 $\mu$ g OVA) subcutaneously near the tumor site  
765 on day 9 followed by a booster dose on day 16. The mice tumor volume was measured 3 time a  
766 week and monitored for survival.

767 We also quantified the immune depletion of the three-effector cell types in the blood and  
768 spleen after 3 depletions by sacrificing 2-4 mice from each group. We harvested blood and spleen  
769 and isolated the splenocytes as described in the CTL assay above. We stained the cells with  
770 Zombie NIR to exclude the dead cells, anti-CD45 (BUV395), anti-CD11b (Alexa Fluor 700) to  
771 exclude all the myeloid cells, and anti-CD3 (PE) for T cells, anti-CD335 (PE-Cy7) for NK cells,  
772 anti-CD4 (Pacific Blue) T cells and anti-CD8a (Alexa Fluor 647) T effector cells (Table 4 SI).

773 Briefly,  $1 \times 10^6$  cells from blood and spleen were stained with above mentioned antibody cocktail  
774 with addition of Fc block in 100 $\mu$ L FACS buffer (0.5% BSA in 1X PBS). The cells were incubated  
775 for 40 minutes on ice and washed with FACS buffer twice by centrifuging at 300g for 5 minutes at  
776 4C. The washed cells were fixed using FIX/Perm buffer (BD Biosciences) for 20 minutes on ice  
777 and washed with 1X Perm buffer twice by centrifuging at 350g for 5 minutes at 4C. The cells were  
778 finally resuspended in 250 $\mu$ L FACS buffer and acquired on Cytex Aurora Spectral Flow Cytometer  
779 followed by analysis on SpectroFlo<sup>®</sup> software.  
780

781 **References:**

- 782 [1] A.D. Waldman, J.M. Fritz, M.J. Lenardo, A guide to cancer immunotherapy: from T cell basic  
783 science to clinical practice, *Nat Rev Immunol* 20(11) (2020) 651-668.
- 784 [2] C.M. Fares, E.M. Van Allen, C.G. Drake, J.P. Allison, S. Hu-Lieskovan, Mechanisms of  
785 Resistance to Immune Checkpoint Blockade: Why Does Checkpoint Inhibitor Immunotherapy Not  
786 Work for All Patients?, *Am Soc Clin Oncol Educ Book* 39 (2019) 147-164.
- 787 [3] H. Wang, D.J. Mooney, Biomaterial-assisted targeted modulation of immune cells in cancer  
788 treatment, *Nat Mater* 17(9) (2018) 761-772.
- 789 [4] M. Sorkin, J. Qi, H.M. Kim, J.B. Hamill, J.H. Kozlow, A.L. Pusic, E.G. Wilkins, Acellular Dermal  
790 Matrix in Immediate Expander/Implant Breast Reconstruction: A Multicenter Assessment of Risks  
791 and Benefits, *Plast Reconstr Surg* 140(6) (2017) 1091-1100.
- 792 [5] P.W. Thomas, J.E.M. Blackwell, P.J.J. Herrod, O. Peacock, R. Singh, J.P. Williams, N.G.  
793 Hurst, W.J. Speake, A. Bhalla, J.N. Lund, Long-term outcomes of biological mesh repair following  
794 extra levator abdominoperineal excision of the rectum: an observational study of 100 patients,  
795 *Tech Coloproctol* 23(8) (2019) 761-767.
- 796 [6] S.F. Badylak, T. Hoppo, A. Nieponice, T.W. Gilbert, J.M. Davison, B.A. Jobe, Esophageal  
797 preservation in five male patients after endoscopic inner-layer circumferential resection in the  
798 setting of superficial cancer: a regenerative medicine approach with a biologic scaffold, *Tissue*  
799 *Eng Part A* 17(11-12) (2011) 1643-50.
- 800 [7] P.V. Membreno, A.A. Eid, C.C. Vanison, M.B. Gillespie, J.P. Gleysteen, Porcine small intestine  
801 graft for reconstruction of oral defects, *Laryngoscope Investig Otolaryngol* 6(5) (2021) 940-947.
- 802 [8] W.K. Sou, C.K. Perng, H. Ma, L.M. Tseng, Y.F. Tsai, Y.S. Lin, P.J. Lien, F.Y. Hsiao, C.J. Feng,  
803 The Effect of Biological Scaffold (Biodesign) in Postmastectomy Direct-to-Implant Breast  
804 Reconstruction: A 5-Year Single-Institution Experience, *Ann Plast Surg* 88(1s Suppl 1) (2022)  
805 S92-S98.
- 806 [9] S.D. Sommerfeld, C. Cherry, R.M. Schwab, L. Chung, D.R. Maestas, Jr., P. Laffont, J.E. Stein,  
807 A. Tam, S. Ganguly, F. Housseau, J.M. Taube, D.M. Pardoll, P. Cahan, J.H. Elisseeff, Interleukin-  
808 36gamma-producing macrophages drive IL-17-mediated fibrosis, *Sci Immunol* 4(40) (2019).
- 809 [10] M.T. Wolf, S. Ganguly, T.L. Wang, C.W. Anderson, K. Sadtler, R. Narain, C. Cherry, A.J.  
810 Parrillo, B.V. Park, G. Wang, F. Pan, S. Sukumar, D.M. Pardoll, J.H. Elisseeff, A biologic scaffold-  
811 associated type 2 immune microenvironment inhibits tumor formation and synergizes with  
812 checkpoint immunotherapy, *Sci Transl Med* 11(477) (2019).
- 813 [11] K. Sadtler, K. Estrellas, B.W. Allen, M.T. Wolf, H. Fan, A.J. Tam, C.H. Patel, B.S. Luber, H.  
814 Wang, K.R. Wagner, J.D. Powell, F. Housseau, D.M. Pardoll, J.H. Elisseeff, Developing a pro-  
815 regenerative biomaterial scaffold microenvironment requires T helper 2 cells, *Science* 352(6283)  
816 (2016) 366-70.
- 817 [12] A.J. Allman, T.B. McPherson, S.F. Badylak, L.C. Merrill, B. Kallakury, C. Sheehan, R.H.  
818 Raeder, D.W. Metzger, Xenogeneic extracellular matrix grafts elicit a TH2-restricted immune  
819 response, *Transplantation* 71(11) (2001) 1631-40.
- 820 [13] B.N. Brown, R. Londono, S. Tottey, L. Zhang, K.A. Kukla, M.T. Wolf, K.A. Daly, J.E. Reing,  
821 S.F. Badylak, Macrophage phenotype as a predictor of constructive remodeling following the  
822 implantation of biologically derived surgical mesh materials, *Acta Biomater* 8(3) (2012) 978-87.
- 823 [14] J.E. Valentin, A.M. Stewart-Akers, T.W. Gilbert, S.F. Badylak, Macrophage participation in  
824 the degradation and remodeling of extracellular matrix scaffolds, *Tissue Eng Part A* 15(7) (2009)  
825 1687-94.
- 826 [15] M.T. Wolf, C.L. Dearth, C.A. Ranallo, S.T. LoPresti, L.E. Carey, K.A. Daly, B.N. Brown, S.F.  
827 Badylak, Macrophage polarization in response to ECM coated polypropylene mesh, *Biomaterials*  
828 35(25) (2014) 6838-49.

- 829 [16] J. Kim, W.A. Li, Y. Choi, S.A. Lewin, C.S. Verbeke, G. Dranoff, D.J. Mooney, Injectable,  
830 spontaneously assembling, inorganic scaffolds modulate immune cells in vivo and increase  
831 vaccine efficacy, *Nat Biotechnol* 33(1) (2015) 64-72.
- 832 [17] A.W. Li, M.C. Sobral, S. Badrinath, Y. Choi, A. Graveline, A.G. Stafford, J.C. Weaver, M.O.  
833 Dellacherie, T.Y. Shih, O.A. Ali, J. Kim, K.W. Wucherpfennig, D.J. Mooney, A facile approach to  
834 enhance antigen response for personalized cancer vaccination, *Nat Mater* 17(6) (2018) 528-534.
- 835 [18] T.Y. Shih, S.O. Blacklow, A.W. Li, B.R. Freedman, S. Bencherif, S.T. Koshy, M.C. Darnell,  
836 D.J. Mooney, Injectable, Tough Alginate Cryogels as Cancer Vaccines, *Adv Healthc Mater* 7(10)  
837 (2018) e1701469.
- 838 [19] O.S. Fenton, M.W. Tibbitt, E.A. Appel, S. Jhunjhunwala, M.J. Webber, R. Langer, Injectable  
839 Polymer-Nanoparticle Hydrogels for Local Immune Cell Recruitment, *Biomacromolecules* 20(12)  
840 (2019) 4430-4436.
- 841 [20] W. Huo, X. Yang, B. Wang, L. Cao, Z. Fang, Z. Li, H. Liu, X.J. Liang, J. Zhang, Y. Jin,  
842 Biomaterialized hydrogel DC vaccine for cancer immunotherapy: A boosting strategy via improving  
843 immunogenicity and reversing immune-inhibitory microenvironment, *Biomaterials* 288 (2022)  
844 121722.
- 845 [21] Y. Vigneswaran, H. Han, R. De Loera, Y. Wen, X. Zhang, T. Sun, C. Mora-Solano, J.H.  
846 Collier, This paper is the winner of an SFB Award in the Hospital Intern, Residency category:  
847 Peptide biomaterials raising adaptive immune responses in wound healing contexts, *J Biomed*  
848 *Mater Res A* 104(8) (2016) 1853-62.
- 849 [22] M.A. Suckow, P. Hall, W. Wolter, V. Sailes, M.C. Hiles, Use of an extracellular matrix material  
850 as a vaccine carrier and adjuvant, *Anticancer Res* 28(5A) (2008) 2529-34.
- 851 [23] Y. Aachoui, S.K. Ghosh, Extracellular matrix from porcine small intestinal submucosa (SIS)  
852 as immune adjuvants, *PLoS One* 6(11) (2011) e27083.
- 853 [24] R.A. Crossley, A. Matz, T. Dew, A. Kalinauskas, N. Faucette, B. Poff, L.K. Silbart, M.A.  
854 Suckow, Safety Evaluation of Autologous Tissue Vaccine Cancer Immunotherapy in a Canine  
855 Model, *Anticancer Res* 39(4) (2019) 1699-1703.
- 856 [25] J.F. Guest, D. Weidlich, H. Singh, J. La Fontaine, A. Garrett, C.J. Abularrage, C.R.  
857 Waycaster, Cost-effectiveness of using adjunctive porcine small intestine submucosa tri-layer  
858 matrix compared with standard care in managing diabetic foot ulcers in the US, *J Wound Care*  
859 26(Sup1) (2017) S12-S24.
- 860 [26] B.M. Sicari, J.P. Rubin, C.L. Dearth, M.T. Wolf, F. Ambrosio, M. Boninger, N.J. Turner, D.J.  
861 Weber, T.W. Simpson, A. Wyse, E.H. Brown, J.L. Dziki, L.E. Fisher, S. Brown, S.F. Badylak, An  
862 acellular biologic scaffold promotes skeletal muscle formation in mice and humans with volumetric  
863 muscle loss, *Sci Transl Med* 6(234) (2014) 234ra58.
- 864 [27] K. Sadtler, M.T. Wolf, S. Ganguly, C.A. Moad, L. Chung, S. Majumdar, F. Housseau, D.M.  
865 Pardoll, J.H. Elisseeff, Divergent immune responses to synthetic and biological scaffolds,  
866 *Biomaterials* 192 (2019) 405-415.
- 867 [28] D. Descamps, K. Hardt, B. Spiessens, P. Izurieta, T. Verstraeten, T. Breuer, G. Dubin, Safety  
868 of human papillomavirus (HPV)-16/18 AS04-adjuvanted vaccine for cervical cancer prevention: a  
869 pooled analysis of 11 clinical trials, *Hum Vaccin* 5(5) (2009) 332-40.
- 870 [29] V. Mata-Haro, C. Cekic, M. Martin, P.M. Chilton, C.R. Casella, T.C. Mitchell, The vaccine  
871 adjuvant monophosphoryl lipid A as a TRIF-biased agonist of TLR4, *Science* 316(5831) (2007)  
872 1628-32.
- 873 [30] J. Fu, D.B. Kanne, M. Leong, L.H. Glickman, S.M. McWhirter, E. Lemmens, K. Mechette, J.J.  
874 Leong, P. Lauer, W. Liu, K.E. Sivick, Q. Zeng, K.C. Soares, L. Zheng, D.A. Portnoy, J.J.  
875 Woodward, D.M. Pardoll, T.W. Dubensky, Jr., Y. Kim, STING agonist formulated cancer vaccines  
876 can cure established tumors resistant to PD-1 blockade, *Sci Transl Med* 7(283) (2015) 283ra52.
- 877 [31] J.J. Woodward, A.T. Iavarone, D.A. Portnoy, c-di-AMP secreted by intracellular *Listeria*  
878 monocytogenes activates a host type I interferon response, *Science* 328(5986) (2010) 1703-5.



- 879 [32] F. Meric-Bernstam, R.F. Sweis, S. Kasper, O. Hamid, S. Bhatia, R. Dummer, A. Stradella,  
880 G.V. Long, A. Spreafico, T. Shimizu, N. Steeghs, J.J. Luke, S.M. McWhirter, T. Muller, N. Nair, N.  
881 Lewis, X. Chen, A. Bean, L. Kattenhorn, M. Pelletier, S. Sandhu, Combination of the STING  
882 Agonist MIW815 (ADU-S100) and PD-1 Inhibitor Spartalizumab in Advanced/Metastatic Solid  
883 Tumors or Lymphomas: An Open-Label, Multicenter, Phase Ib Study, *Clin Cancer Res* 29(1)  
884 (2023) 110-121.
- 885 [33] L. Zheng, D. Ding, B.H. Edil, C. Judkins, J.N. Durham, D.L. Thomas, 2nd, K.M. Bever, G. Mo,  
886 S.E. Solt, J.A. Hoare, R. Bhattacharya, Q. Zhu, A. Osipov, B. Onner, K.A. Purtell, H. Cai, R.  
887 Parkinson, A. Hacker-Prietz, J.M. Herman, D.T. Le, N.S. Azad, A.M.C. De Jesus-Acosta, A.B.  
888 Blair, V. Kim, K.C. Soares, L. Manos, J.L. Cameron, M.A. Makary, M.J. Weiss, R.D. Schulick, J.  
889 He, C.L. Wolfgang, E.D. Thompson, R.A. Anders, E. Sugar, E.M. Jaffee, D.A. Laheru, Vaccine-  
890 Induced Intratumoral Lymphoid Aggregates Correlate with Survival Following Treatment with a  
891 Neoadjuvant and Adjuvant Vaccine in Patients with Resectable Pancreatic Adenocarcinoma, *Clin*  
892 *Cancer Res* 27(5) (2021) 1278-1286.
- 893 [34] G. Dranoff, GM-CSF-based cancer vaccines, *Immunol Rev* 188 (2002) 147-54.
- 894 [35] C.H. Tang, J.A. Zundell, S. Ranatunga, C. Lin, Y. Nefedova, J.R. Del Valle, C.C. Hu, Agonist-  
895 Mediated Activation of STING Induces Apoptosis in Malignant B Cells, *Cancer Res* 76(8) (2016)  
896 2137-52.
- 897 [36] E.L. Dane, A. Belessiotis-Richards, C. Backlund, J. Wang, K. Hidaka, L.E. Milling, S.  
898 Bhagchandani, M.B. Melo, S. Wu, N. Li, N. Donahue, K. Ni, L. Ma, M. Okaniwa, M.M. Stevens,  
899 A. Alexander-Katz, D.J. Irvine, STING agonist delivery by tumour-penetrating PEG-lipid  
900 nanodiscs primes robust anticancer immunity, *Nat Mater* 21(6) (2022) 710-720.
- 901 [37] H. HogenEsch, D.T. O'Hagan, C.B. Fox, Optimizing the utilization of aluminum adjuvants in  
902 vaccines: you might just get what you want, *NPJ Vaccines* 3 (2018) 51.
- 903 [38] C.H. Kugel, 3rd, S.M. Douglass, M.R. Webster, A. Kaur, Q. Liu, X. Yin, S.A. Weiss, F.  
904 Darvishian, R.N. Al-Rohil, A. Ndoeye, R. Behera, G.M. Alicea, B.L. Ecker, M. Fane, M.J.  
905 Allegranza, N. Svoronos, V. Kumar, D.Y. Wang, R. Somasundaram, S. Hu-Lieskovan, A. Ozgun,  
906 M. Herlyn, J.R. Conejo-Garcia, D. Gabilovich, E.L. Stone, T.S. Nowicki, J. Sosman, R. Rai, M.S.  
907 Carlino, G.V. Long, R. Marais, A. Ribas, Z. Eroglu, M.A. Davies, B. Schilling, D. Schadendorf, W.  
908 Xu, R.K. Amaravadi, A.M. Menzies, J.L. McQuade, D.B. Johnson, I. Osman, A.T. Weeraratna,  
909 Age Correlates with Response to Anti-PD1, Reflecting Age-Related Differences in Intratumoral  
910 Effector and Regulatory T-Cell Populations, *Clin Cancer Res* 24(21) (2018) 5347-5356.
- 911 [39] K. Sadtler, S.D. Sommerfeld, M.T. Wolf, X. Wang, S. Majumdar, L. Chung, D.S. Kelkar, A.  
912 Pandey, J.H. Elisseff, Proteomic composition and immunomodulatory properties of urinary  
913 bladder matrix scaffolds in homeostasis and injury, *Semin Immunol* 29 (2017) 14-23.
- 914 [40] K. Lim, T.H. Kim, A. Trzeciak, A.M. Amitrano, E.C. Reilly, H. Prizant, D.J. Fowell, D.J.  
915 Topham, M. Kim, In situ neutrophil efferocytosis shapes T cell immunity to influenza infection, *Nat*  
916 *Immunol* 21(9) (2020) 1046-1057.
- 917 [41] L. Cai, J. Xu, Z. Yang, R. Tong, Z. Dong, C. Wang, K.W. Leong, Engineered biomaterials for  
918 cancer immunotherapy, *MedComm* (2020) 1(1) (2020) 35-46.
- 919 [42] T.Y. Shih, A.J. Najibi, A.L. Bartlett, A.W. Li, D.J. Mooney, Ultrasound-triggered release  
920 reveals optimal timing of CpG-ODN delivery from a cryogel cancer vaccine, *Biomaterials* 279  
921 (2021) 121240.
- 922 [43] G.A. Roth, E.C. Gale, M. Alcantara-Hernandez, W. Luo, E. Axpe, R. Verma, Q. Yin, A.C. Yu,  
923 H. Lopez Hernandez, C.L. Maikawa, A.A.A. Smith, M.M. Davis, B. Pulendran, J. Idoyaga, E.A.  
924 Appel, Injectable Hydrogels for Sustained Codelivery of Subunit Vaccines Enhance Humoral  
925 Immunity, *ACS Cent Sci* 6(10) (2020) 1800-1812.
- 926 [44] M.C. Hanson, M.P. Crespo, W. Abraham, K.D. Moynihan, G.L. Szeto, S.H. Chen, M.B. Melo,  
927 S. Mueller, D.J. Irvine, Nanoparticulate STING agonists are potent lymph node-targeted vaccine  
928 adjuvants, *J Clin Invest* 125(6) (2015) 2532-46.

- 929 [45] Y. He, C. Hong, S. Huang, J.A. Kaskow, G. Covarrubias, I.S. Pires, J.C. Sacane, P.T.  
930 Hammond, A.M. Belcher, STING Protein-Based In Situ Vaccine Synergizes CD4(+) T, CD8(+) T,  
931 and NK Cells for Tumor Eradication, *Adv Healthc Mater* (2023) e2300688.
- 932 [46] J. Le Naour, L. Zitvogel, L. Galluzzi, E. Vacchelli, G. Kroemer, Trial watch: STING agonists  
933 in cancer therapy, *Oncoimmunology* 9(1) (2020) 1777624.
- 934 [47] J. Crouse, U. Kalinke, A. Oxenius, Regulation of antiviral T cell responses by type I  
935 interferons, *Nat Rev Immunol* 15(4) (2015) 231-42.
- 936 [48] P.S. Cottler, H. Kang, V. Nash, L. Salopek, A.C. Bruce, K.L. Spiller, C.A. Campbell,  
937 Immunomodulation of Acellular Dermal Matrix Through Interleukin 4 Enhances Vascular  
938 Infiltration, *Ann Plast Surg* 88(5 Suppl 5) (2022) S466-S472.
- 939 [49] S.B. Sonnenberg, A.A. Rane, C.J. Liu, N. Rao, G. Agmon, S. Suarez, R. Wang, A. Munoz,  
940 V. Bajaj, S. Zhang, R. Braden, P.J. Schup-Magoffin, O.L. Kwan, A.N. DeMaria, J.R. Cochran, K.L.  
941 Christman, Delivery of an engineered HGF fragment in an extracellular matrix-derived hydrogel  
942 prevents negative LV remodeling post-myocardial infarction, *Biomaterials* 45 (2015) 56-63.
- 943 [50] J.E. Reing, B.N. Brown, K.A. Daly, J.M. Freund, T.W. Gilbert, S.X. Hsiung, A. Huber, K.E.  
944 Kullas, S. Tottey, M.T. Wolf, S.F. Badylak, The effects of processing methods upon mechanical  
945 and biologic properties of porcine dermal extracellular matrix scaffolds, *Biomaterials* 31(33)  
946 (2010) 8626-33.
- 947 [51] H. Toyota, N. Yanase, T. Yoshimoto, M. Harada, Y. Kato, J. Mizuguchi, Vaccination with  
948 OVA-bound nanoparticles encapsulating IL-7 inhibits the growth of OVA-expressing E.G7 tumor  
949 cells in vivo, *Oncol Rep* 33(1) (2015) 292-6.
- 950 [52] T.A. Tockary, S. Abbasi, M. Matsui-Masai, A. Hayashi, N. Yoshinaga, E. Boonstra, Z. Wang,  
951 S. Fukushima, K. Kataoka, S. Uchida, Comb-structured mRNA vaccine tethered with short  
952 double-stranded RNA adjuvants maximizes cellular immunity for cancer treatment, *Proc Natl*  
953 *Acad Sci U S A* 120(29) (2023) e2214320120.
- 954 [53] R. Miura, S.I. Sawada, S.A. Mukai, Y. Sasaki, K. Akiyoshi, Synergistic anti-tumor efficacy by  
955 combination therapy of a self-assembled nanogel vaccine with an immune checkpoint anti-PD-1  
956 antibody, *RSC Adv* 10(14) (2020) 8074-8079.
- 957 [54] J. Han, Y. Zhao, K. Shirai, A. Molodtsov, F.W. Kolling, J.L. Fisher, P. Zhang, S. Yan, T.G.  
958 Searles, J.M. Bader, J. Gui, C. Cheng, M.S. Ernstoff, M.J. Turk, C.V. Angeles, Resident and  
959 circulating memory T cells persist for years in melanoma patients with durable responses to  
960 immunotherapy, *Nat Cancer* 2(3) (2021) 300-311.
- 961 [55] R.G. Majzner, C.L. Mackall, Tumor Antigen Escape from CAR T-cell Therapy, *Cancer Discov*  
962 8(10) (2018) 1219-1226.
- 963 [56] S.L. Shiao, B. Ruffell, D.G. DeNardo, B.A. Faddegon, C.C. Park, L.M. Coussens, TH2-  
964 Polarized CD4(+) T Cells and Macrophages Limit Efficacy of Radiotherapy, *Cancer Immunol Res*  
965 3(5) (2015) 518-25.
- 966 [57] F.J. Lowery, S. Krishna, R. Yossef, N.B. Parikh, P.D. Chatani, N. Zacharakis, M.R. Parkhurst,  
967 N. Levin, S. Sindiri, A. Sachs, K.J. Hitscherich, Z. Yu, N.R. Vale, Y.C. Lu, Z. Zheng, L. Jia, J.J.  
968 Gartner, V.K. Hill, A.R. Copeland, S.K. Nah, R.V. Masi, B. Gasmi, S. Kivitz, B.C. Paria, M.  
969 Florentin, S.P. Kim, K.I. Hanada, Y.F. Li, L.T. Ngo, S. Ray, M.L. Shindorf, S.T. Levi, R. Shepherd,  
970 C. Toy, A.Y. Parikh, T.D. Prickett, M.C. Kelly, R. Beyer, S.L. Goff, J.C. Yang, P.F. Robbins, S.A.  
971 Rosenberg, Molecular signatures of antitumor neoantigen-reactive T cells from metastatic human  
972 cancers, *Science* 375(6583) (2022) 877-884.
- 973 [58] M. Rodolfo, C. Zilocchi, P. Accornero, B. Cappetti, I. Arioli, M.P. Colombo, IL-4-transduced  
974 tumor cell vaccine induces immunoregulatory type 2 CD8 T lymphocytes that cure lung  
975 metastases upon adoptive transfer, *J Immunol* 163(4) (1999) 1923-8.

976
